# Supplementary material for: A Direct Primary Motor Cortex-Globus Pallidus Internus Circuit Regulates Both Motor and Non-Motor Symptoms in Parkinson's Disease.
Source: Research Square preprint supplement (doi:10.21203/rs.3.rs-5990552/v1), 2025-02-14
Supplement: Supplementary file 1 [file ac93f405e0652a3e573a6c18.docx]

**Supplementary Information**

**A Direct Primary Motor Cortex-Globus Pallidus Internus Circuit Regulates Both Motor and Non-Motor Symptoms in Parkinson's Disease.**

*Yaqian Li1,# , Xueping Zhang1,#, Ruobing Zheng1,#, Qianwen Wang1, Zikang Liu1, Derong Li2, Yong Wang**1,**

1Department of Physiology and Pathophysiology, School of Basic Medical Sciences, Capital Medical University, Beijing, 100069, China.

2Departments of Basic Medical Sciences, School of Basic Medical Sciences, Capital Medical University, Beijing, 100069, China.

*Corresponding author: [kingyong@ccmu.edu.cn](mailto:kingyong@ccmu.edu.cn)

#Contributed equally

**Supplementary figures**

**
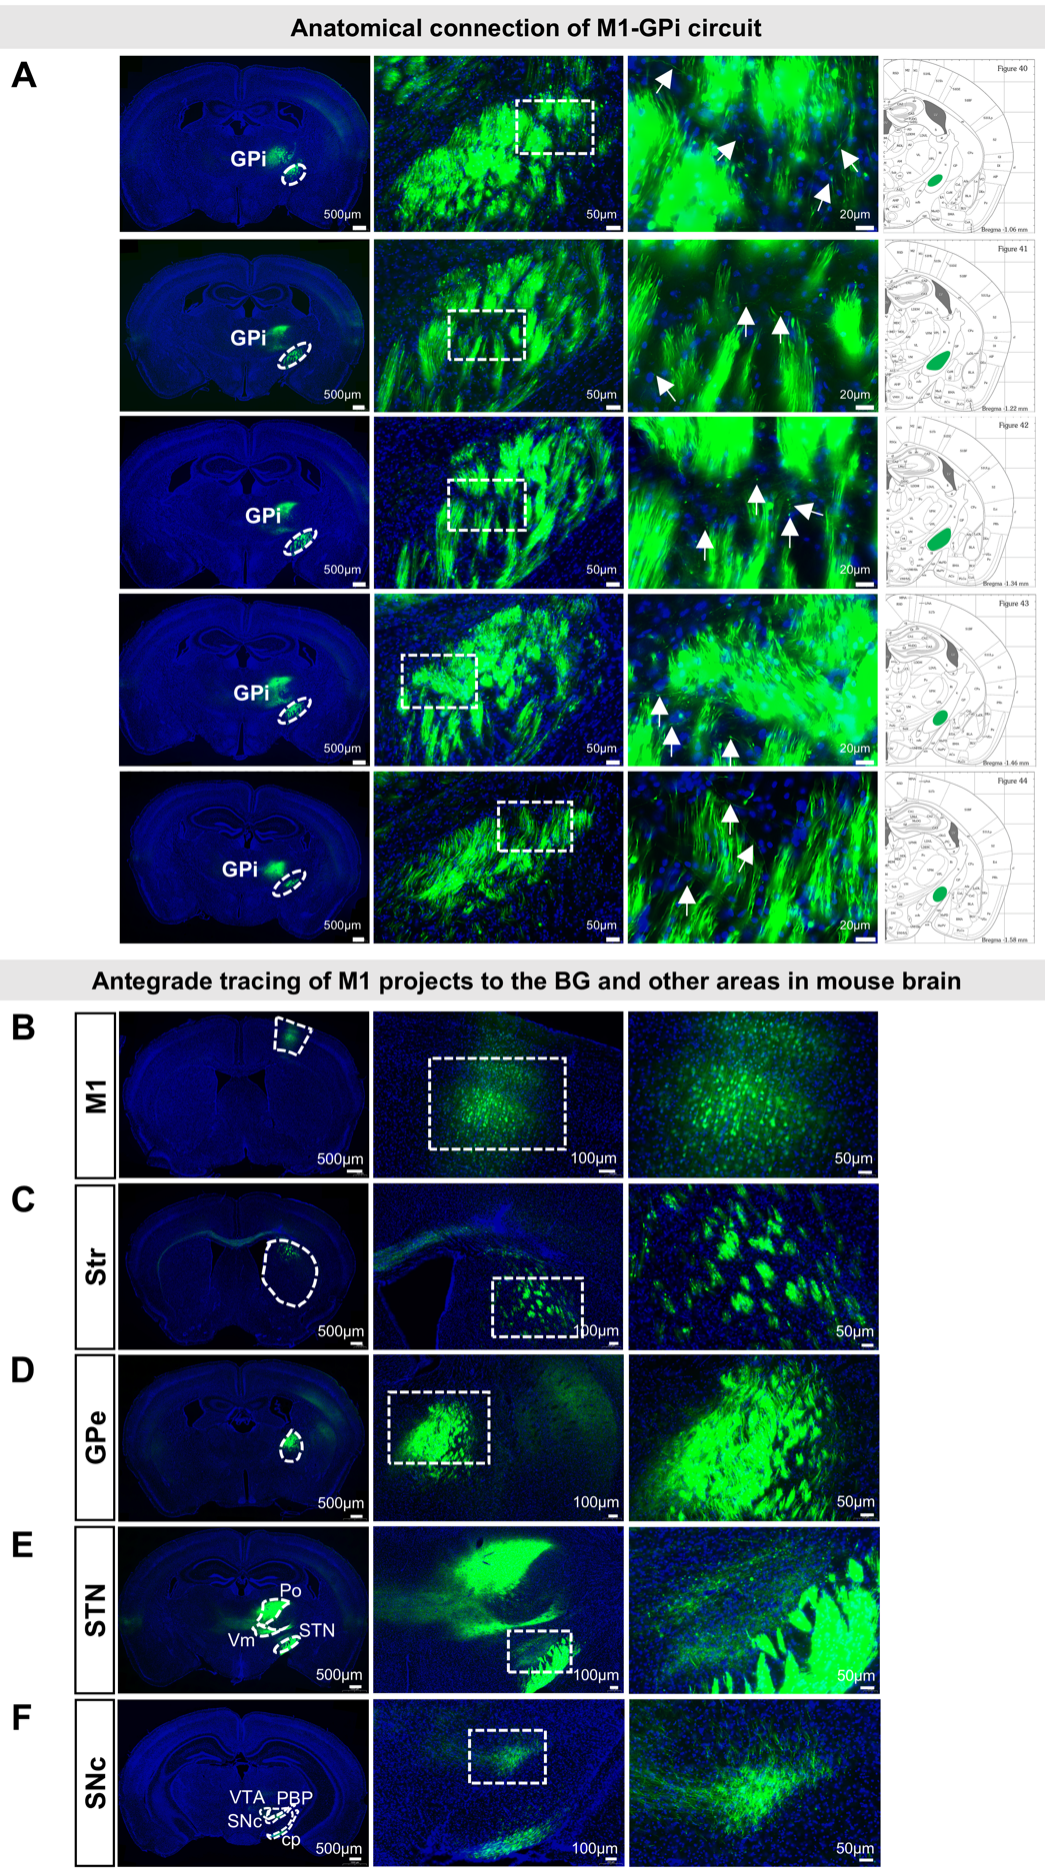
**

**Figure S1. Antegrade tracing of motor cortex M1 projects to the basal ganglia (BG) and other areas in mouse brain.**

A) Representative images of the GPi, showing projections originating from M1 via antegrade tracing. The filamentous axonal fibers and puncta, visible in green and originating from M1, are denoted by arrows.

B) Representative Images show AAV-EF1α-EYFP expression in M1 and high-magnification images from a selected area in the leftward image.

C-F) Representative images show that M1 neurons project to the GPe、Str、STN、Vm、Po、SNc.


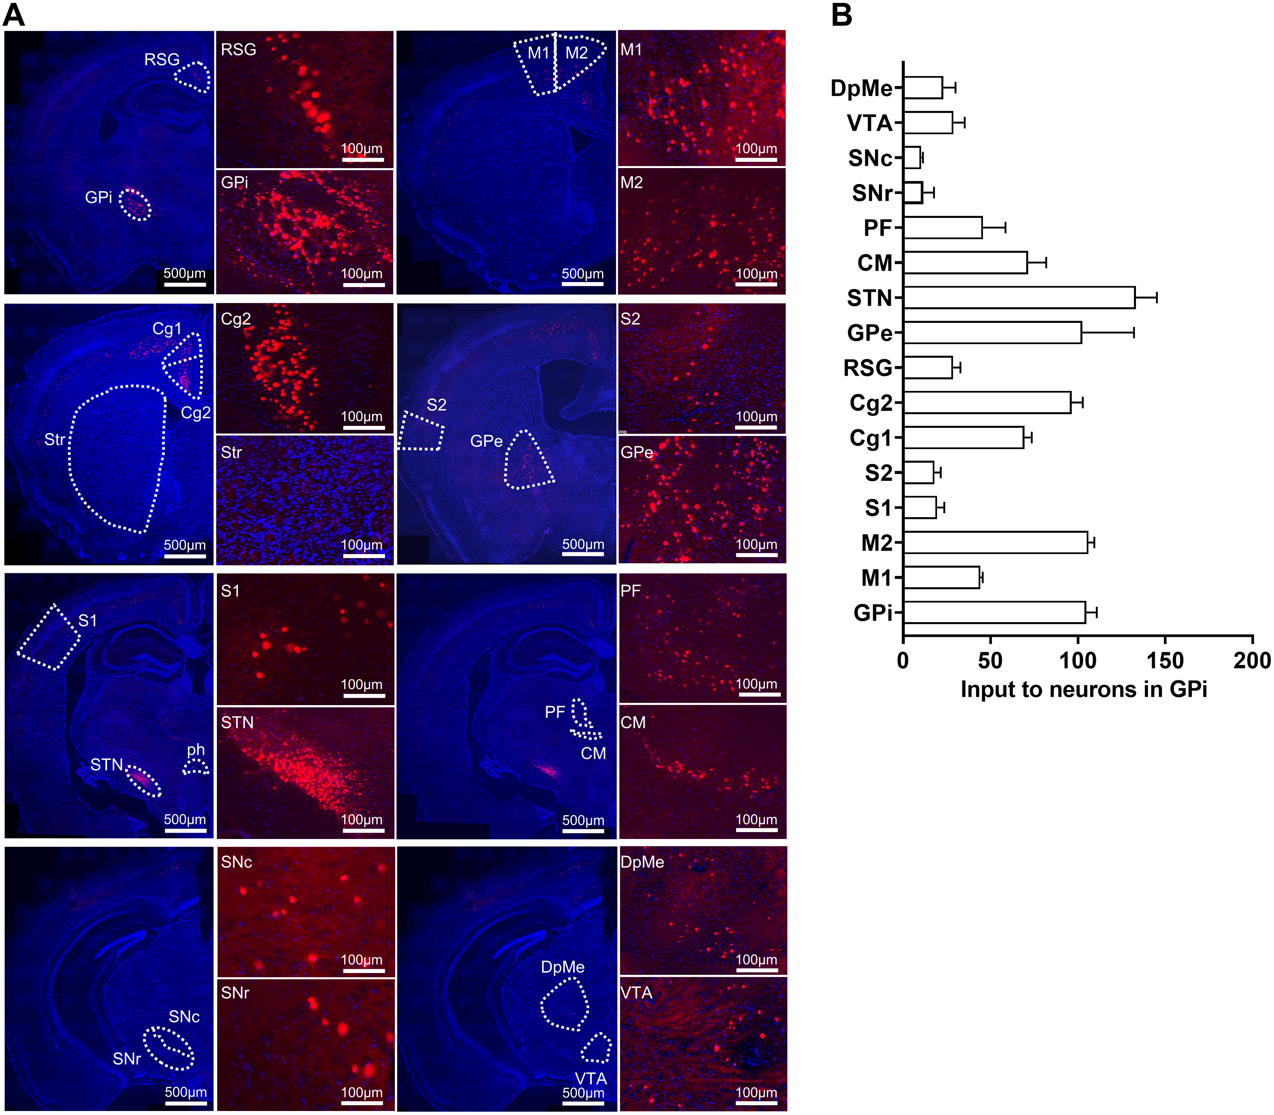


**Figure S2. Retrograde tracing shows the M1 directly projects to the GPi.**

1. Representative images show the inputs to the GPi by retrograde tracing. The M1 is one of main inputs to the GPi. The neurons in motor cortex M1 are robustly labelled by the retrogradely expressed mCherry.

B) Counting numbers of input neurons labelled by retrograde tracing relative to the GPi. n =3 mice.

GPi, globus pallidus interna; M1, primary motor cortex; M2, secondary motor cortex; S1, primary somatosensory cortex; S2, secondary somatosensory cortex; Cg1, cingulate cortex area 1; Cg2, cingulate cortex area 2; RSG; retrosplenial granular cortex; GPe, globus pallidus externa; STN, subthalamic nucleus; CM/PF, central medial thalamic nucleus / parafascicular thalamic nucleus; SNr, substantia nigra pars reticulate; SNc, substantia nigra pars compacta; VTA, ventral tegmental area; DpMe, deep mesencephalic nucleus.


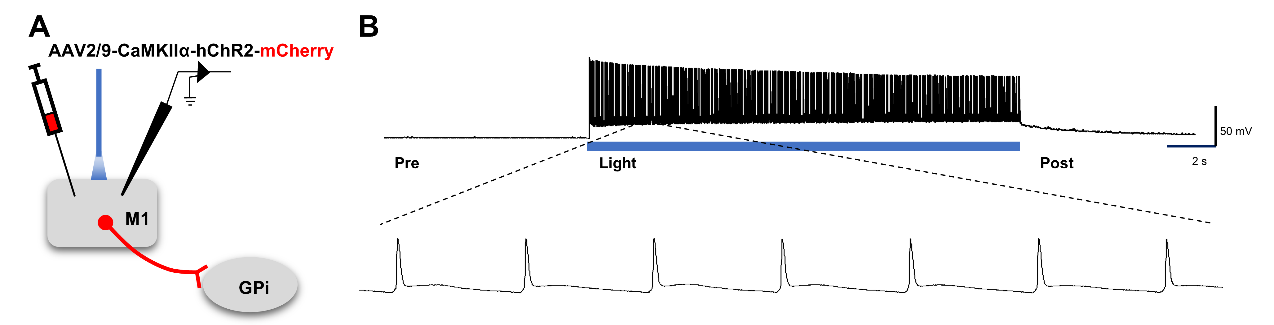


**Figure S3. Optogenetic stimulation induces action potentials in neurons of the M1 region.**

A) Schematic of the electrophysiological experiment using whole-cell patch-clamp technique. These ChR2-expressing neurons in M1 are optogenetic-activated using 473 nm blue light.

B) Representative tracing demonstrating that optogenetic stimulation induces action potentials in neurons of the M1 region.


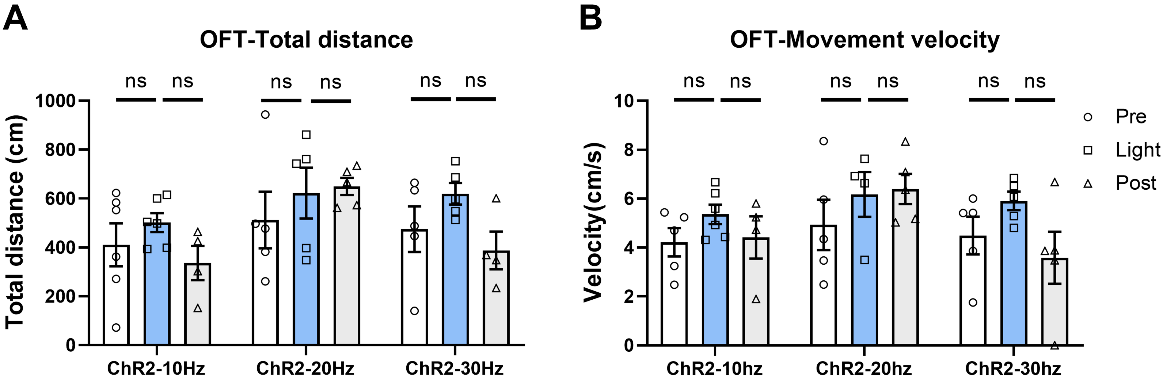


**Figure S4. Unilaterally optogenetic activation at different frequency have no significant effects on local motion of mice under normal condition.**

A) Total distance in OFT with ChR2 activation at frequencies of 10hz, 20hz and 30hz. (n = 4 ~ 6 mice for the ChR2 group. Two-way ANOVA with Bonferroni’s multiple comparisons test, n.s., no statistically-significant difference).

B) Movement velocity in OFT with ChR2 activation at frequencies of 10hz, 20hz and 30hz. (n = 4 ~ 6 mice for the ChR2 group. Two-way ANOVA with Bonferroni’s multiple comparisons test, n.s., no statistically-significant difference).


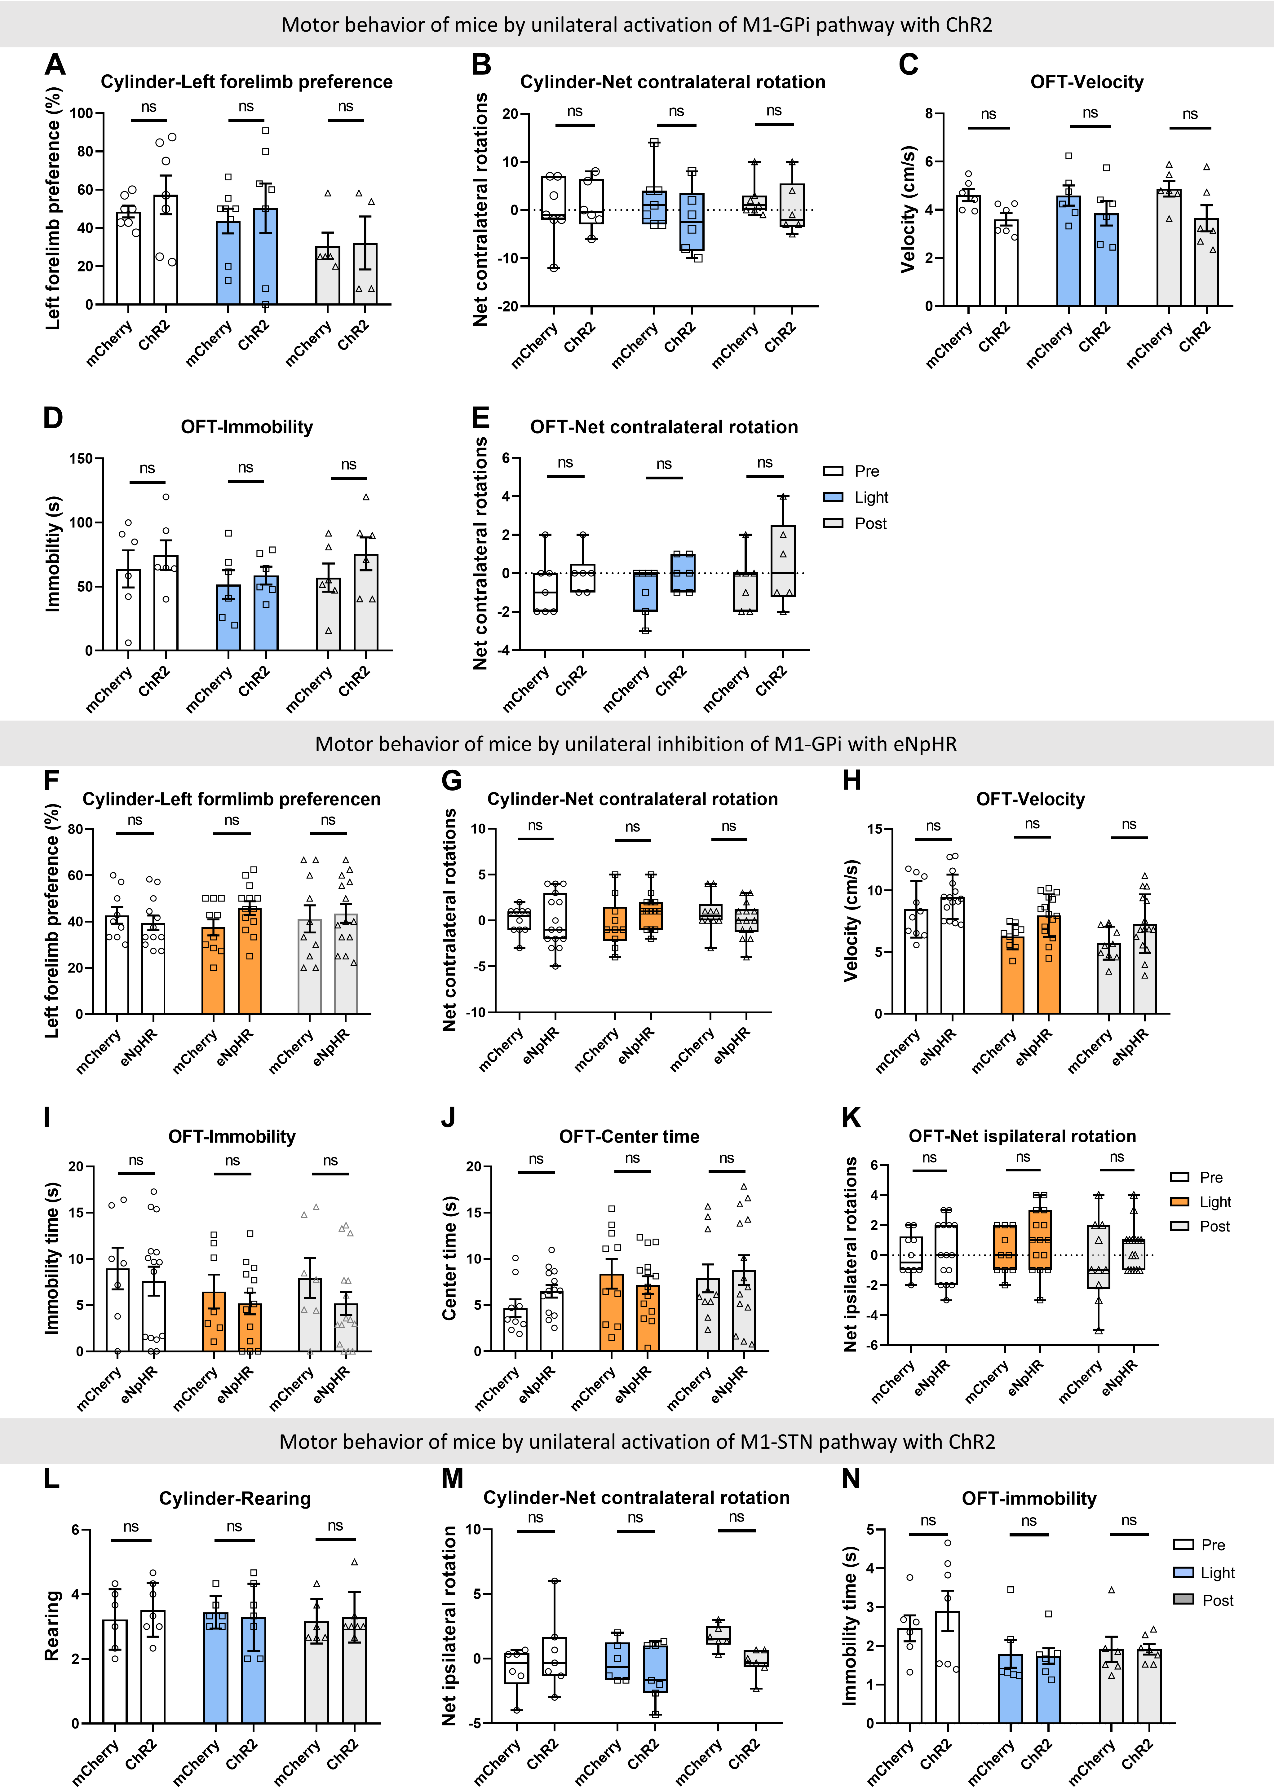


**Figure S5. Motor behavior of mice with optogenetic manipulation of ChR2 and eNpHR under normal condition.**

A-E) Unilateral injection of AAV-CaMKII-ChR2-mCherry induces ChR2 expression in glutamatergic neurons within the M1. Optic fibers are implanted to activate axon terminals from the glutamatergic M1neurons using 473nm light. Unilaterally optogenetic activation of glutamatergic M1 neurons (ChR2 Light) leads to no significant changes in the left forelimb

preference (A), net contralateral ration in the Cylinder test (B), as well as the velocity (C), immobility (D) and net contralateral rotation (E) in the OFT. (n = 5 ~ 8 mice for the mCherry group, n = 4 ~ 7 mice for the ChR2 group. Two-way ANOVA with Bonferroni’s multiple comparisons test, n.s., no statistically-significant difference).

F-K) Unilaterally optogenetic inhibition of post-synaptical neurons of M1-GPi pathway by eNpHR (589 nM) under normal condition. No significant changes are found in the left forelimb preference (F), Net contralateral ration (G) in the Cylinder test, as well as the velocity (H), immobility (I), center time (J) and net ipsilateral rotation (K) in the OFT. (n = 7 ~ 10 mice for the mCherry group, n = 12 ~ 15 mice for the eNpHR group. Two-way ANOVA with Bonferroni’s multiple comparisons test, n.s., no statistically-significant difference).

L-M) Cylinder test. Optogenetic activation of glutamatergic M1-STN pathway leads to no significant changes in the rearing (L) or the net contralateral rotation (M). (n = 6 mice for the mCherry group, n = 7 mice for the ChR2 group. Two-way ANOVA with Bonferroni’s multiple comparisons test, n.s., no statistically-significant difference).

N) OFT. No significant changes in immobility (N). (n = 6 mice for the mCherry group, n = 7 mice for the ChR2 group. Two-way ANOVA with Bonferroni’s multiple comparisons test, n.s., no statistically-significant difference).


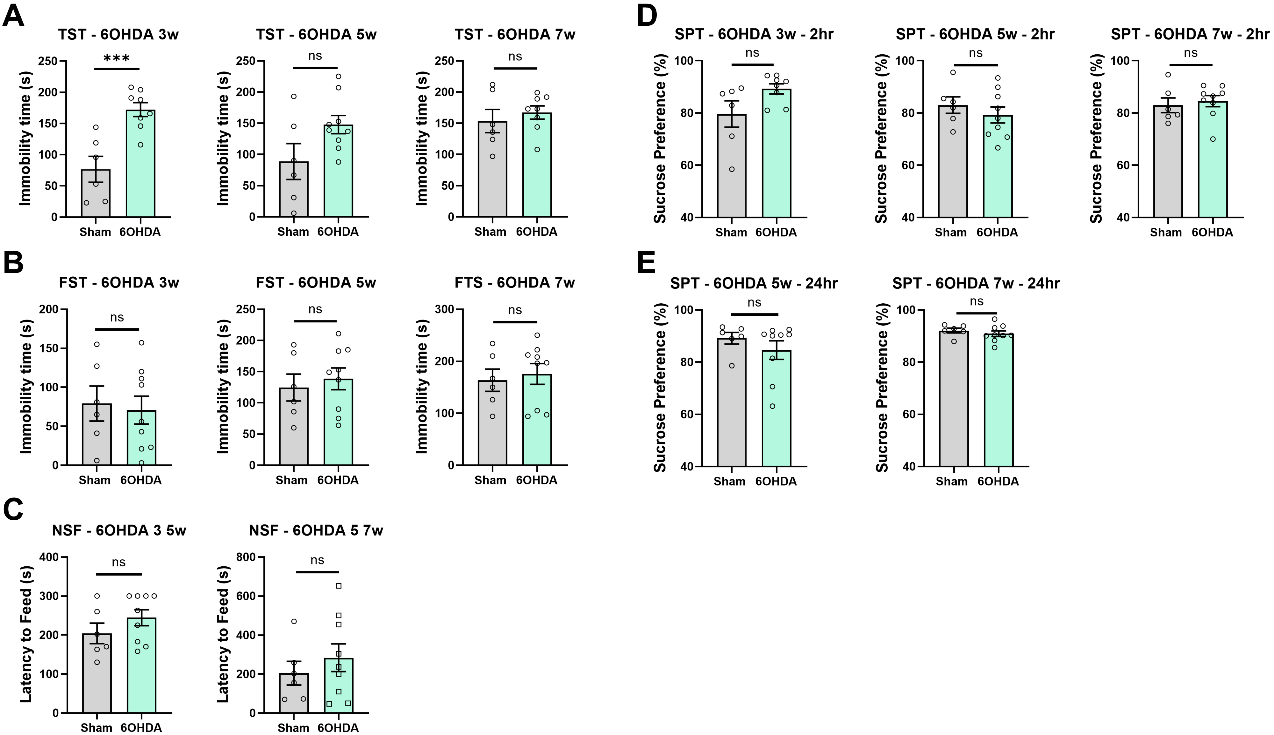


**Figure S6. Effects of duration of unilateral 6-OHDA lesion in SNc on depressive-like behaviors of mice.**

A) Effects of 3, 5 and 7 weeks of unilateral 6-OHDA lesion in SNc on TST. A significant increase in immobility is observed in mice with 3 weeks of 6-OHDA lesioned SNc, but not in those with 5 and 7 weeks of lesions. (n = 6 mice for the Sham group, n = 8 ~ 9 mice for the 6OHDA group. Unpaired t-test in two-sided manner, n.s., no statistically-significant difference, ***p < 0.001).

B) Effects of 3, 5 and 7 weeks of unilateral 6-OHDA lesion in SNc on FST. No significant difference found. (n = 6 mice for the Sham group, n = 9 mice for the 6OHDA group. Unpaired t-test in two-sided manner for FST in 3, 5 weeks, Mann-Whitney test in two-sided manner for FST in 7 weeks, n.s., no statistically significant difference).

C) Effects of 3, 5 and 7 weeks of unilateral 6-OHDA lesion in SNc on NSF. No significant difference found. (n = 6 mice for the Sham group, n = 9 mice for the 6OHDA group. Unpaired t-test in two-sided manner for NSF in 5, 7 weeks, Mann-Whitney test in two-sided manner for NSF in 3, 5 weeks, n.s., no statistically significant difference).

D) Effects of 3, 5, and 7 weeks of unilateral 6-OHDA lesions in the SNc on a 2-hour SPT test. No significant difference found. (n = 6 mice for the Sham group, n = 8 ~ 9 mice for the 6OHDA group. Unpaired t-test in two-sided manner, n.s., no statistically-significant difference).

E) Effects of 3, 5, and 7 weeks of unilateral 6-OHDA lesions in the SNc on a 24-hour SPT test. No significant difference found, similar to results of the 2-hours SPT test. Thus, a 2-hour SPT test is considered sufficient, and the 2-hour test will be conducted for the remainder of the SPT experiments. (n = 6 mice for the Sham group, n = 9 mice for the 6OHDA group. Unpaired t-test in two-sided manner for SPT in 7 weeks, Mann-Whitney test in two-sided manner for SPT in 5 weeks, n.s., no statistically-significant difference).


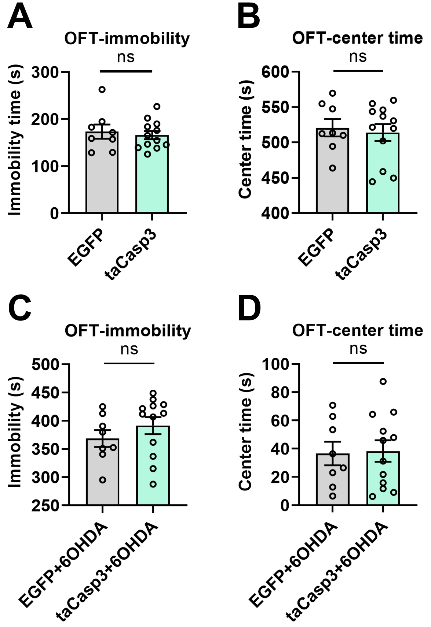


**Figure S7. Effects of ablation of pre-synaptic M1-GPi pathway on local motion of mice.**

A-B) Ablation of pre-synaptic M1-GPi pathway with taCasp3 has no significant effects on immobility (A) and center time (B) in OFT of mice under normal condition. (n = 8 mice for the EGFP group, n = 12 mice for the taCasp3 group. Unpaired t-test in two-sided manner, n.s., no statistically significant difference).

C-D) Ablation of pre-synaptic M1-GPi pathway with taCasp3 has no significant effects on immobility (A) and center time (B) in OFT of unilateral 6-OHDA lesioned mice. (n = 8 mice for the EGFP+6OHDA group, n = 12 mice for the taCasp3+6OHDA group. Unpaired t-test in two-sided manner, n.s., no statistically-significant difference).


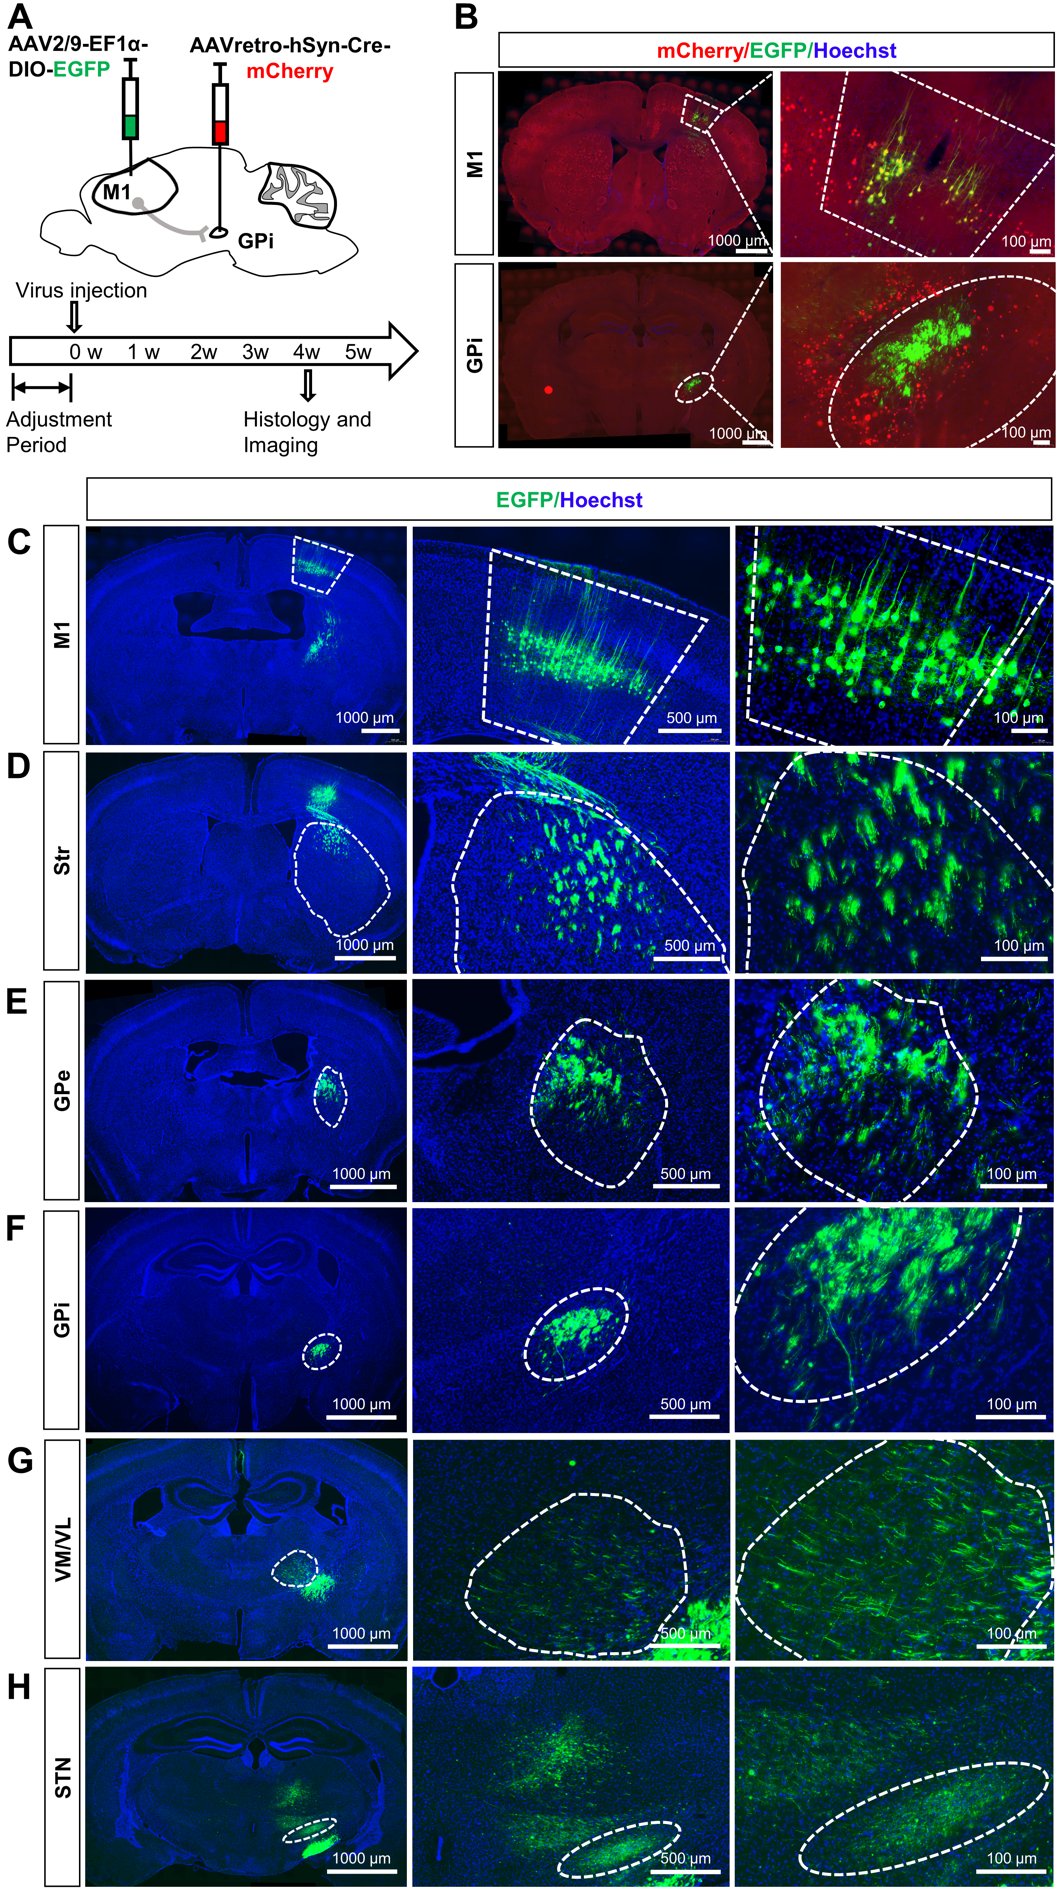


**Figure S8. Collateral projections of the M1-GPi pathway.**

A) Schematic of experiments. The GPi is injected with the retrograde AAVretro-Cre-mCherry, and the M1 is injected with AAV2/9-DIO-EGFP.

B) Representative images display the injection sites in both GPi and M1. In M1, neurons labeled in green or yellow demonstrate EGFP expression induced by retrograde Cre from GPi. In GPi, green fibers represent axons from M1 neurons expressing EGFP.

C) Representative images display the soma and dendrites of M1 neurons that project to the GPi, labeled through retrograde tracing from the GPi.

D-H) Representative images display collateral branches of the M1-GPi pathway, extending to various structures including the Stratum (D), Globus Pallidus externus (E), VL/VM (G), STN (H), and the GPi itself (F).


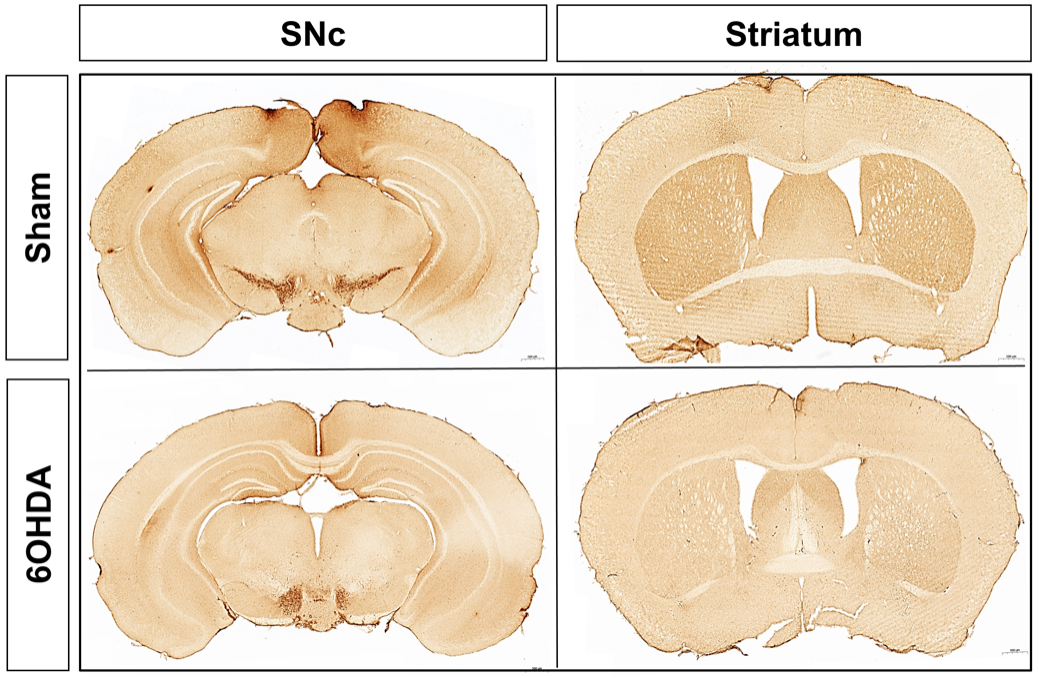


**Figure S9. The loss of dopaminergic neurons in SNc and dopaminergic fiber in Striatum of bilateral 6-OHDA lesioned mice.**

Representative images show the loss of TH positive neurons in the SNc and TH positive fiber in the striatum of bilateral 6-OHDA lesioned mice.

**
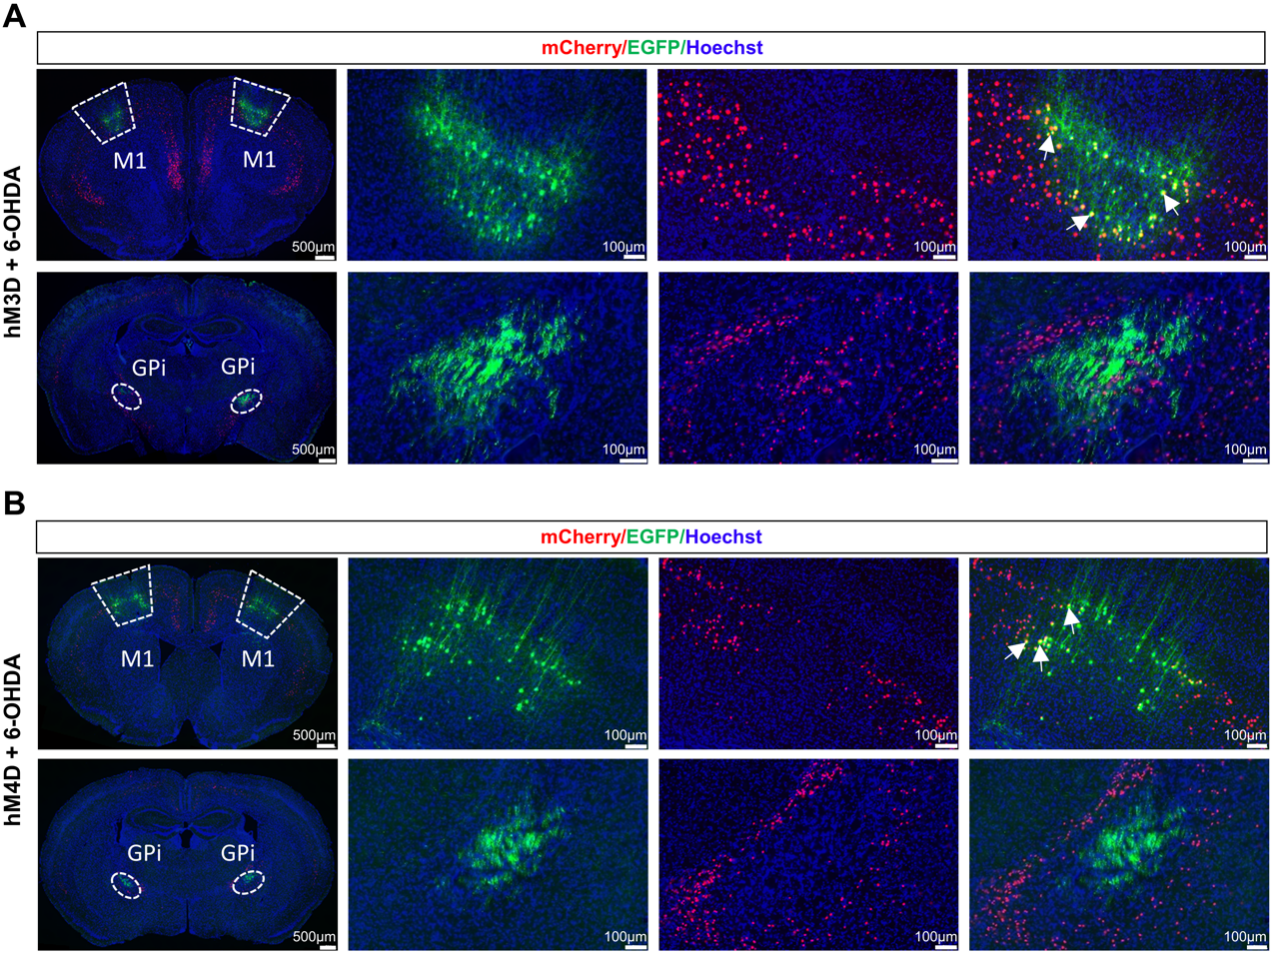
**

**Figure S10. Anatomical characterization of the pre-synaptic M1-GPi pathway expressing hM3D or hM4D in 6-OHDA lesioned mice.**

Injecting AAVretro-Cre-mCherry into the GPi allows for the retrograde expression of Cre in M1 neurons. Injections of AAV-DIO-hM3D-EGFP or AAV-DIO-hM4D-EGFP into M1, in the presence of Cre, ensure the specific expression of hM3D or hM4D proteins in the M1 neurons that project to the GPi. The SNc is lesioned using 6-OHDA.

A) The pre-synaptic hM3D-EGFP expression in M1 neurons and re-projection to GPi of the M1-GPi pathway remain intact in 6-OHDA lesioned mice, indicating that the SNc lesioned by 6-OHDA does not affect the integrity of the M1-GPi pathway.

B) Similiarly, the pre-synaptic hM4D-EGFP expression in M1 neurons and re-projection to GPi of the M1-GPi pathway remain intact in 6-OHDA lesioned mice, confirming that the SNc lesioned by 6-OHDA does not affect the integrity of the M1-GPi pathway.

**Supplementary Table S1. Statistical analysis for Figures.**

| **Figure and numbers of animals used** | **Statistical analysis** | ***Post hoc tests*** | **Mean ± SEM.** |
| --- | --- | --- | --- |
| 1N neuronal oEPSC amplitudes  Pre: (n = 4 neurons, 2 mice)  Light: (n = 4 neurons,  2 mice) | Unpaired t-test in two-sided manner  t = 4.674 p = 0.0034 |  | Mean ± s.e.m.  Pre: 12.57 ± 0.6569 Light: 20.31 ± 1.519 |
| 2C Rotarod Test  Pre mCherry: (n = 6) Pre ChR2: (n = 6)  Light mCherry: (n = 6) Light ChR2: (n = 6)  Post mCherry: (n = 6) Post ChR2: (n = 6) | Two-way ANOVA  Interaction:  F (2, 30) = 3.373  P=0.0477  Row Factor:  F (1, 30) = 6.110 P=0.0193  Column Factor:  F (2, 30) = 1.922 P=0.1639 | Bonferroni’s multiple  comparisons test  mCherry - ChR2: Pre p > 0.9999 Light p = 0.0138 Post p = 0.2564 | Mean ± s.e.m.  Pre mCherry: 117.2± 2.833  Pre ChR2: 120 ± 0 Light mCherry: 119.3 ± 0.6667  Light ChR2: 103.8 ± 7.208  Post mCherry: 120 ± 0  Post ChR2: 111 ±  4.05 |
| 2D Rearing behavior in the cylinder test  Pre mCherry: (n = 7) Pre ChR2: (n = 6)  Light mCherry: (n = 6) Light ChR2: (n = 6)  Post mCherry: (n = 7) Post ChR2: (n = 6) | Two-way ANOVA  Interaction:  F (2, 32) = 2.345 P=0.1121  Row Factor:  F (1, 32) = 11.12 P=0.0022  Column Factor: F (2, 32) = 2.891 P=0.0701 | Bonferroni’s multiple  comparisons test  mCherry - ChR2: Pre p > 0.9999 Light p = 0.0043 Post p = 0.2891 | Mean ± s.e.m.  Pre mCherry: 9 ±  0.9759  Pre ChR2: 9.833 ±  0.3073  Light mCherry: 8.667 ± 1.358  Light ChR2: 14.5 ± 0.9574  Post mCherry: 7.571 ± 1.556  Post ChR2: 10.33 ± 1.174 |
| 2E Total distance of open field test  Pre mCherry: (n = 6) Pre ChR2: (n = 6)  Light mCherry: (n = 6) | Two-way ANOVA  Interaction:  F (2, 30) = 0.1852 P=0.8318  Row Factor: | Bonferroni’s multiple  comparisons test  mCherry - ChR2: Pre p = 0.2521 | Mean ± s.e.m.  Pre mCherry: 553.1± 30.15  Pre ChR2: 432.1 ± 30.84 |

| Light ChR2: (n = 6)  Post mCherry: (n = 6)  Post ChR2: (n = 6) | F (1, 30) = 9.229 P=0.0049  Column Factor:  F (2, 30) = 0.07939 P=0.9239 | Light p = 0.6025 Post p = 0.1150 | Light mCherry: 550.8 ± 50.08  Light ChR2: 462.3 ± 60.82  Post mCherry: 584.1 ± 37.9  Post ChR2: 437.5 ± 65.11 |
| --- | --- | --- | --- |
| 2H Rotarod test  Pre mCherry: (n = 10) Pre eNpHR: (n = 15) Light mCherry: (n = 9) Light eNpHR: (n = 15) Post mCherry: (n = 10)  Post eNpHR: (n = 14) | Two-way ANOVA  Interaction:  F (2, 67) = 4.970 P=0.0097  Row Factor:  F (1, 67) = 4.408 P=0.0395  Column Factor: F(2, 67) = 7.414 P=0.0012 | Bonferroni’s multiple  comparisons test  mCherry - eNpHR: Pre p > 0.9999  Light p = 0.0014 Post p > 0.9999 | Mean ± s.e.m.  Pre mCherry: 113.1± 2.718  Pre eNpHR: 115.5 ± 1.345  Light mCherry: 111.4 ± 2.604  Light eNpHR: 95 ± 3.874  Post mCherry: 106± 2.773  Post eNpHR: 104 ± 3.458 |
| 2I Rearing behavior in the cylinder test  Pre mCherry: (n = 10) Pre eNpHR: (n = 15) Light mCherry: (n = 10)  Light eNpHR: (n = 13) Post mCherry: (n = 10)  Post eNpHR: (n = 15) | Two-way ANOVA  Interaction:  F (2, 67) = 0.9018 P=0.4107  Row Factor:  F (1, 67) = 3.710 P=0.0583  Column Factor:  F (2, 67) = 6.238  P=0.0033 | Bonferroni’s multiple  comparisons test  mCherry - eNpHR: Pre p > 0.9999  Light p = 0.1930 Post p = 0.5285 | Mean ± s.e.m.  Pre mCherry: 9.6 ± 0.9214  Pre eNpHR: 9.667 ± 0.5492  Light mCherry: 8.4± 0.67  Light eNpHR: 10.38 ± 0.6049  Post mCherry: 6.6 ± 0.9333  Post eNpHR: 8 ±  0.7105 |
| 2J Open field test | Two-way ANOVA | Bonferroni’s multiple | Mean ± s.e.m. |
| Pre mCherry: (n = 10) | Interaction: | comparisons test | Pre mCherry: 945.6± |
| Pre eNpHR: (n = 15) | F (2, 69) = 0.1311 |  | 75.13 |
| Light mCherry: (n = | P=0.8774 | mCherry - eNpHR: | Pre eNpHR: 1052 ± |
| 10) | Row Factor: | Pre p = 0.6151 | 47.8 |
| Light eNpHR: (n = 15) | F (1, 69) = 7.871 | Light p = 0.3561 | Light mCherry: 762.5 |
| Post mCherry: (n = | P=0.0065 | Post p = 0.1483 | ± 59.23 |

| 10)  Post eNpHR: (n = 15) | Column Factor: F (2, 69) = 10.06 P=0.0001 |  | Light eNpHR: 894.1 ± 47.42  Post mCherry: 655.5 ± 46.35  Post eNpHR: 822.2± 65.65 |
| --- | --- | --- | --- |
| 2M Rotarod test  Pre mCherry: (n = 6) Pre ChR2: (n = 6)  Light mCherry: (n = 6) Light ChR2: (n = 6)  Post mCherry: (n = 6) Post ChR2: (n = 6) | Two-way ANOVA  Interaction:  F (2, 30) = 1.928 P=0.1631  Row Factor:  F (1, 30) = 6.246 P=0.0182  Column Factor: F (2, 30) = 2.441 P=0.1042 | Bonferroni’s multiple  comparisons test  mCherry - ChR2: Pre p > 0.9999 Light p = 0.0382 Post p = 0.2690 | Mean ± s.e.m.  Pre mCherry: 119.5± 0.5  Pre ChR2: 119.8± 0.1667  Light mCherry: 120± 0  Light ChR2: 108.2 ± 6.685  Post mCherry: 117.2 ± 1.759  Post ChR2: 109.3 ± 3.432 |
| 2N Cylinder test  Pre mCherry: (n = 5) Pre ChR2: (n = 7)  Light mCherry: (n = 5) Light ChR2: (n = 7)  Post mCherry: (n = 5) Post ChR2: (n = 7) | Two-way ANOVA  Interaction:  F (2, 30) = 3.312 P=0.0501  Row Factor:  F (1, 30) = 3.009 P=0.0931  Column Factor: F (2, 30) = 1.046 P=0.3636 | Bonferroni’s multiple  comparisons test  mCherry - ChR2: Pre p > 0.9999 Light p = 0.0208 Post p > 0.9999 | Mean ± s.e.m.  Pre mCherry: 42.22± 8.302  Pre ChR2: 34.52 ± 5.225  Light mCherry: 33.78 ± 6.013  Light ChR2: 64.37 ± 8.873  Post mCherry: 40.56 ± 6.894  Post ChR2: 49.37 ± 7.297 |
| 2O Open field test  Pre mCherry: (n = 6) Pre ChR2: (n = 7)  Light mCherry: (n = 6) Light ChR2: (n = 7)  Post mCherry: (n = 6) Post ChR2: (n = 7) | Two-way ANOVA  Interaction:  F (2, 33) = 0.09989  P=0.9052  Row Factor:  F (1, 33) = 0.04556 P=0.8323  Column Factor: F (2, 33) = 5.013 P=0.0126 | Bonferroni’s multiple  comparisons test  mCherry - ChR2: Pre p > 0.9999 Light p > 0.9999 Post p > 0.9999 | Mean ± s.e.m.  Pre mCherry: 784.8± 131.8  Pre ChR2: 720.2 ± 96.5  Light mCherry: 936.4 ± 46.04  Light ChR2: 954.3 ± 111.1  Post mCherry: 647.8 ± 74.02  Post ChR2: 644.4 ± 84.31 |

| 3B OD of TH+ fibers (%of the intact side) | | Unpaired t-test in two-sided manner |  | Mean ± s.e.m. |
| --- | --- | --- | --- | --- |
|  | | t=9.174, p<0.0001 |  | Sham: 96.52 ± |
| Sham: (n = 6) | |  |  | 6.673 |
| 6OHDA: (n = 6) | |  |  | 6OHDA: 32.23 ±  2.139 |
| Number of TH+ cell | |  |  |  |
| (%of the intact side) | | Unpaired t-test in two-sided manner |  | Sham: 85.66 ±  2.335 |
| Sham: (n = 6) | | t=24.16, p<0.0001 |  | 6OHDA: 5.930 ± |
| 6OHDA: (n = 6) | |  |  | 2.332 |
| 3C APO-induced contralateral | | Mann-Whitney test in two-sided manner |  | Mean ± s.e.m. |
| rotations | | p=0.0007 |  | Sham: -0.1667 ±  0.1667 |
| Sham: (n = 6) | |  |  | 6OHDA: 6.625 ± |
| 6OHDA: (n = 8) | |  |  | 0.4605 |
| 3D Rotarod test  Sham: (n = 6) 6OHDA: (n = 9) | | Mann-Whitney test in two-sided manner  p= 0.0004 |  | Mean ± s.e.m.  Sham: 118.2 ±  1.160  6OHDA: 66.74 ±  8.484 |
| 3E Rearing in the cylinder test  Sham: (n = 6) 6OHDA: (n = 9) | | Unpaired t-test in two-sided manner  t=4.809, p= 0.0003 |  | Mean ± s.e.m.  Sham: 28.67 ±  1.801  6OHDA: 14.00 ±  2.167 |
| 3F Right preference | forelimb in the | Mann-Whitney test in two-sided manner |  | Mean ± s.e.m. |
| cylinder test | | p= 0.0484 |  | Sham: 22.62 ±  5.570 |
| Sham: (n = 6) | |  |  | 6OHDA: 43.01 ± |
| 6OHDA: (n = 9) | |  |  | 6.382 |
| 3G Total distance in the OFT  Sham: (n = 6) 6OHDA: (n = 9) | | Unpaired t-test in two-sided manner  t=2.800, p= 0.0150 |  | Mean ± s.e.m.  Sham: 4757 ±  191.5  6OHDA: 3485 ±  344.9 |

| 3H Velocity in the OFT  Sham: (n = 6) 6OHDA: (n = 9) | Mann-Whitney test in two-sided manner  p= 0.0496 |  | Mean ± s.e.m.  Sham: 85.67 ±  3.009  6OHDA: 66.74 ±  5.734 |
| --- | --- | --- | --- |
| 3I Immobility in the OFT  Sham: (n = 6) 6OHDA: (n = 9) | Unpaired t-test in two-sided manner  t=2.446, p= 0.0295 |  | Mean ± s.e.m.  Sham: 45.33 ±  4.541  6OHDA: 77.94 ±  10.34 |
| 3J Tail suspension test  Sham: (n = 6) 6OHDA: (n = 8) | Unpaired t-test in two-sided manner  t=4.361, p= 0.0009 |  | Mean ± s.e.m.  Sham: 76.67 ±  20.66  6OHDA: 172.3 ±  11.14 |
| 3K Forced swim test  Sham: (n = 6) 6OHDA: (n = 9) | Unpaired t-test in two-sided manner    t=0.2947, p= 0.7728 |  | Mean ± s.e.m.  Sham: 79.17 ±  22.40  6OHDA: 70.78 ±  17.82 |
| 3L Sucrose preference test  Sham: (n = 6) 6OHDA: (n = 9) | Unpaired t-test in two-sided manner    t=1.988, p= 0.0701 |  | Mean ± s.e.m.  Sham: 79.62 ±  5.043  6OHDA: 89.27 ±  1.920 |
| 3M Novelty -suppressed feeding | Mann-Whitney test in two-sided manner |  | Mean ± s.e.m. |
| test | p= 0.2260 |  | Sham: 204.2 ±  26.25 |
| Sham: (n = 6) |  |  | 6OHDA: 244.3 ± |
| 6OHDA: (n = 9) |  |  | 20.36 |
| 4D Neuron number of M1  EGFP: (n = 8)  taCasp3: (n = 12) | Mann-Whitney test in two-sided manner  p<0.0001 |  | Mean ± s.e.m.  EGFP: 63.63 ±  5.928  taCasp3: 11.83 ±  4.003 |
| 4E Rotarod test | Unpaired t-test in two-sided manner |  | Mean ± s.e.m. |

| EGFP: (n = 8)  taCasp3: (n = 12) | t=2.017, p= 0.0588 |  | EGFP: 114.9 ±  1.774  taCasp3: 108.5 ±  2.300 |
| --- | --- | --- | --- |
| 4F Open field test  EGFP: (n = 8)  taCasp3: (n = 12) | Unpaired t-test in two-sided manner  t=0.2131, p=0.8337 |  | Mean ± s.e.m.  EGFP: 3525 ± 255.9 taCasp3: 3459 ± 189.0 |
| 4G Open field test  EGFP: (n = 8)  taCasp3: (n = 12) | Mann-Whitney test in two-sided manner  p= 0.5714 |  | Mean ± s.e.m.  EGFP: 8.177 ±  0.3610  taCasp3: 7.922 ±  0.3108 |
| 4H Cylinder test  EGFP: (n = 8)  taCasp3: (n = 12) | Unpaired t-test in two-sided manner  t=0.1026, p= 0.9194 |  | Mean ± s.e.m.  EGFP: 29.00 ±  2.719  taCasp3: 29.33 ±  1.944 |
| 4I Cylinder test  EGFP: (n = 8)  taCasp3: (n = 12) | Unpaired t-test in two-sided manner  t=1.466, p= 0.1598 |  | Mean ± s.e.m.  EGFP: -0.7500 ±  2.505  taCasp3: 3.750 ±  1.871 |
| 4J Cylinder test  EGFP: (n = 8)  taCasp3: (n = 12) | Unpaired t-test in two-sided manner  t=0.06954, p=  0.9453 |  | Mean ± s.e.m.  EGFP: 47.44 ±  8.882  taCasp3: 48.08 ±  4.671 |
| 4K Rotarod test | Unpaired t-test in two-sided manner |  | Mean ± s.e.m. |
| EGFP+6OHDA: (n = | t=0.8307, p= 0.4170 |  | EGFP+6OHDA: |
| 8) |  |  | 82.75 ± 9.482 |
| taCasp3+6OHDA: (n |  |  | taCasp3+6OHDA: |
| = 12) |  |  | 72.89 ± 7.354 |
| 4L Openfield test  EGFP+6OHDA: (n = | Unpaired t-test in two-sided manner  t=1.198, p= 0.2465 |  | Mean ± s.e.m.  EGFP+6OHDA: 1722 |

| 8)  taCasp3+6OHDA: (n = 12) |  |  | ± 220.7  taCasp3+6OHDA: 1399 ± 163.6 |
| --- | --- | --- | --- |
| 4M Open field test | Unpaired t-test in two-sided manner |  | Mean ± s.e.m. |
| EGFP+6OHDA: (n = | t=1.054, p= 0.3058 |  | EGFP+6OHDA: |
| 8) |  |  | 7.312 ± 0.5736 |
| taCasp3+6OHDA: (n |  |  | taCasp3+6OHDA: |
| = 12) |  |  | 6.589 ± 0.4108 |
| 4N Cylinder test | Unpaired t-test in two-sided manner |  | Mean ± s.e.m. |
| EGFP+6OHDA: (n = | t=2.476, p= 0.0249 |  | EGFP+6OHDA: |
| 7) |  |  | 17.00 ± 1.633 |
| taCasp3+6OHDA: (n |  |  | taCasp3+6OHDA: |
| = 11) |  |  | 12.45 ± 1.039 |
| 4O Cylinder test | Unpaired t-test in two-sided manner |  | Mean ± s.e.m. |
| EGFP+6OHDA: (n = | t=0.4968, p=0.6254 |  | EGFP+6OHDA: |
| 8) |  |  | 0.1250 ± 0.7181 |
| taCasp3+6OHDA: (n |  |  | taCasp3+6OHDA: - |
| = 12) |  |  | 0.3333 ± 0.5817 |
| 4P Cylinder test | Mann-Whitney test in two-sided manner |  | Mean ± s.e.m. |
| EGFP+6OHDA: (n = | p>0.9999 |  | EGFP+6OHDA: |
| 7) |  |  | 7.945 ± 2.780 |
| taCasp3+6OHDA: (n |  |  | taCasp3+6OHDA: |
| = 12) |  |  | 10.89 ± 3.854 |
| 5C Rotarod test  EGFP+6OHDA: (n =  16)  hM3D+6OHDA: (n = 15)  hM4D+6OHDA: ( = 15) | One-way ANOVA  Treatment:  F (2, 43) = 2.211, p = 0.0071 | Tukey’s multiple comparisons test  EGFP+6OHDA vs.  hM3D+6OHDA: p = 0.1371  EGFP+6OHDA vs.  hM4D+6OHDA: p = 0.3383  hM3D+6OHDA vs. hM4D+6OHDA: p =0.005 | Mean ± s.e.m. EGFP+6OHDA: 70.79 ± 4.564 hM3D+6OHDA: 55.16 ± 7.217 hM4D+6OHDA:  82.20 ± 5.100 |
| 5D Total distance in | One-way ANOVA | Tukey’s multiple | Mean ± s.e.m. |
| OFT |  | comparisons test |  |
|  | Treatment: |  | EGFP+6OHDA: 3094 |
| EGFP+6OHDA: (n = | F (2, 39) = 1.094, | EGFP+6OHDA vs. | ± 306.6 |
| 16) | p = 0.0909 | hM3D+6OHDA: p = | hM3D+6OHDA: |

| hM3D+6OHDA: (n = 14)  hM4D+6OHDA: (n = 13) |  | 0.6503  EGFP+6OHDA vs.  hM4D+6OHDA: p = 0.3211  hM3D+6OHDA vs. hM4D+6OHDA: p = 0.0763 | 2667 ± 399.3 hM4D+6OHDA: 3826 ± 343.8 |
| --- | --- | --- | --- |
| 5E Velocity in OFT  EGFP+6OHDA: (n =  16)  hM3D+6OHDA: (n = 15)  hM4D+6OHDA: (n = 14) | One-way ANOVA  Treatment:  F (2, 42) = 0.9209, p = 0.0208 | Tukey’s multiple comparisons test  EGFP+6OHDA vs.  hM3D+6OHDA: p = 0.3303  EGFP+6OHDA vs.  hM4D+6OHDA: p = 0.2793  hM3D+6OHDA vs. hM4D+6OHDA: p = 0.0153 | Mean ± s.e.m.  EGFP+6OHDA: 10.52 ± 0.5893 hM3D+6OHDA: 8.911 ± 0.9156 hM4D+6OHDA:  12.28 ± 0.8935 |
| 5F Immobility in OFT | One-way ANOVA | Tukey’s multiple comparisons test | Mean ± s.e.m. |
| EGFP+6OHDA: (n = | Treatment: |  | EGFP+6OHDA: |
| 14) | F (2, 39) = 0.8129, | EGFP+6OHDA vs. | 313.0 ± 13.79 |
| hM3D+6OHDA: (n = | p = 0.0069 | hM3D+6OHDA: p = | hM3D+6OHDA: |
| 14) |  | 0.6441 | 334.3 ± 20.83 |
| hM4D+6OHDA: (n = |  | EGFP+6OHDA vs. | hM4D+6OHDA: |
| 14) |  | hM4D+6OHDA: p = 0.0591 | 257.1 ± 14.74 |
|  |  | hM3D+6OHDA vs. hM4D+6OHDA: p = 0.0064 |  |
| 5G High speed movement in OFT  EGFP+6OHDA: (n =  15)  hM3D+6OHDA: (n = 14)  hM4D+6OHDA: (n = 15) | One-way ANOVA  Treatment:  F (2, 41) = 0.7179, p = 0.0034 | Tukey’s multiple comparisons test  EGFP+6OHDA vs.  hM3D+6OHDA: p = 0.5256  EGFP+6OHDA vs.  hM4D+6OHDA: p = 0.0461  hM3D+6OHDA vs. hM4D+6OHDA: p = 0.0031 | Mean ± s.e.m.  EGFP+6OHDA: 11.18 ± 1.689 hM3D+6OHDA: 7.791 ± 1.939 hM4D+6OHDA:  18.71 ± 2.745 |
| 5H Middle speed | One-way ANOVA | Tukey’s multiple | Mean ± s.e.m. |

| movement in OFT  EGFP+6OHDA: (n =  15)  hM3D+6OHDA: (n = 13)  hM4D+6OHDA: (n = 14) | Treatment:  F (2, 39) = 0.3822, p = 0.0905 | comparisons test  EGFP+6OHDA vs.  hM3D+6OHDA: p = 0.4088  EGFP+6OHDA vs.  hM4D+6OHDA: p = 0.5663  hM3D+6OHDA vs. hM4D+6OHDA: p = 0.0740 | EGFP+6OHDA: 17.39 ± 0.7785 hM3D+6OHDA: 15.87 ± 0.9887 hM4D+6OHDA:  18.58 ± 0.7285 |
| --- | --- | --- | --- |
| 5I Low speed movement in OFT  EGFP+6OHDA: (n =  14)  hM3D+6OHDA: (n = 10)  hM4D+6OHDA: (n = 14) | One-way ANOVA  Treatment:  F (2, 35) = 2.655, p = 0.6457 | Tukey’s multiple comparisons test  EGFP+6OHDA vs.  hM3D+6OHDA: p = 0.9771  EGFP+6OHDA vs.  hM4D+6OHDA: p = 0.6371  hM3D+6OHDA vs. hM4D+6OHDA: p = 0.8066 | Mean ± s.e.m.  EGFP+6OHDA: 19.54 ± 0.5714 hM3D+6OHDA: 19.36 ± 0.4411 hM4D+6OHDA:  18.78 ± 0.7233 |
| 5J TST | One-way ANOVA | Tukey’s multiple comparisons test | Mean ± s.e.m. |
| EGFP+6OHDA: (n = | Treatment: |  | EGFP+6OHDA: |
| 11) | F (2, 36) = 0.6487, | EGFP+6OHDA vs. | 98.18 ± 5.669 |
| hM3D+6OHDA: (n = | p = 0.0261 | hM3D+6OHDA: p = | hM3D+6OHDA: |
| 13) |  | 0.1432 | 119.0 ± 8.244 |
| hM4D+6OHDA: (n = |  | EGFP+6OHDA vs. | hM4D+6OHDA: |
| 15) |  | hM4D+6OHDA: p = 0.7966 | 91.47 ± 7.125 |
|  |  | hM3D+6OHDA vs. hM4D+6OHDA: p = 0.0235 |  |
| 5K FST | One-way ANOVA | Tukey’s multiple comparisons test | Mean ± s.e.m. |
| EGFP+6OHDA: (n = | Treatment: |  | EGFP+6OHDA: |
| 8) | F (2, 21) = 0.3531, | EGFP+6OHDA vs. | 109.4 ± 15.74 |
| hM3D+6OHDA: (n = | p = 0.9477 | hM3D+6OHDA: p = | hM3D+6OHDA: |
| 9) |  | 0.9457 | 114.8 ± 8.058 |
| hM4D+6OHDA: (n = |  | EGFP+6OHDA vs. | hM4D+6OHDA: |

| 7) |  | hM4D+6OHDA: p = 0.9955  hM3D+6OHDA vs. hM4D+6OHDA: p = 0.9749 | 111.0 ± 12.94 |
| --- | --- | --- | --- |
| 5L SPT | One-way ANOVA | Tukey’s multiple comparisons test | Mean ± s.e.m. |
| EGFP+6OHDA: (n = | Treatment: |  | EGFP+6OHDA: |
| 11) | F (2, 34) = 1.610, | EGFP+6OHDA vs. | 59.31 ± 4.556 |
| hM3D+6OHDA: (n = | p = 0.9253 | hM3D+6OHDA: p = | hM3D+6OHDA: |
| 13) |  | 0.9550 | 57.20 ± 6.222 |
| hM4D+6OHDA: (n = |  | EGFP+6OHDA vs. | hM4D+6OHDA: |
| 13) |  | hM4D+6OHDA: p = 0.9974 | 59.80 ± 3.933 |
|  |  | hM3D+6OHDA vs. hM4D+6OHDA: p = 0.9260 |  |
| 5M Center time in OFT  EGFP+6OHDA: (n =  16)  hM3D+6OHDA: (n = 12)  hM4D+6OHDA: (n = 15) | One-way ANOVA  Treatment:  F (2, 40) = 0.5527, p = 0.2320 | Tukey’s multiple comparisons test  EGFP+6OHDA vs.  hM3D+6OHDA: p = 0.9060  EGFP+6OHDA vs.  hM4D+6OHDA: p = 0.2190  hM3D+6OHDA vs. hM4D+6OHDA: p = 0.4858 | Mean ± s.e.m.  EGFP+6OHDA: 16.22 ± 2.533 hM3D+6OHDA: 17.84 ± 3.416 hM4D+6OHDA:  22.31 ± 2.091 |
| 6C Rotarod test  mCherry+Sham: (n = 7)  hM3D+Sham: (n = 8) mCherry+6OHDA: (n = 6)  hM3D+6OHDA: (n = 7) | One-way ANOVA  Treatment:  F (3, 24) = 8.794, p = 0.0052 | Tukey’s multiple  comparisons test mCherry+Sham vs. hM3D+Sham: p = 0.8899  mCherry+6OHDA vs. hM3D+6OHDA: p = 0.0275 | Mean ± s.e.m.  mCherry+Sham:  110.4 ± 2.182  hM3D+Sham: 103.2 ± 3.416  mCherry+6OHDA:  105.2 ± 6.813 hM3D+6OHDA: 72.29 ± 12.79 |
| 6D Rearing of the cylinder test | One-way ANOVA | Tukey’s multiple comparisons test | Mean ± s.e.m. |

| mCherry+Sham: (n = 7)  hM3D+Sham: (n = 8) mCherry+6OHDA: (n = 10)  hM3D+6OHDA: (n = 8) | Treatment:  F (3, 29) = 2.563, p = 0.0015 | mCherry+Sham vs. hM3D+Sham: p = 0.9952  mCherry+6OHDA vs. hM3D+6OHDA: p = 0.1018 | mCherry+Sham:  30.71 ± 3.343  hM3D+Sham: 29.38 ± 2.790  mCherry+6OHDA:  21.10 ± 4.762 hM3D+6OHDA:  8.750 ± 2.987 |
| --- | --- | --- | --- |
| 6E Total distance in | One-way ANOVA | Tukey’s multiple | Mean ± s.e.m. |
| OFT |  | comparisons test |  |
|  | Treatment: | mCherry+Sham vs. | mCherry+Sham: |
| mCherry+Sham: (n = | F (3, 27) = 3.378, | hM3D+Sham: p = | 2970 ± 203.7 |
| 7) | p = 0.0007 | 0.9514 | hM3D+Sham: 2727 |
| hM3D+Sham: (n = 8) |  | mCherry+6OHDA | ± 188.2 |
| mCherry+6OHDA: (n |  | vs. hM3D+6OHDA: | mCherry+6OHDA: |
| = 8) |  | p = 0.0018 | 2959 ± 492.2 |
| hM3D+6OHDA: (n = |  |  | hM3D+6OHDA: |
| 8) |  |  | 1138 ± 263.8 |
| 6F Velocity in OFT  mCherry+Sham: (n = 7)  hM3D+Sham: (n = 8) mCherry+6OHDA: (n = 8)  hM3D+6OHDA: (n = 8) | One-way ANOVA  Treatment:  F (3, 27) = 4.018, p = 0.0023 | Tukey’s multiple comparisons test  mCherry+Sham vs. hM3D+Sham: p = 0.9820  mCherry+6OHDA vs. hM3D+6OHDA: p = 0.0141 | Mean ± s.e.m.  mCherry+Sham:  8.884 ± 0.3028  hM3D+Sham: 8.567 ± 0.3137  mCherry+6OHDA:  8.405 ± 0.9443 hM3D+6OHDA:  5.711 ± 0.4879 |
| 6G Immobility in OFT  mCherry+Sham: (n = 7)  hM3D+Sham: (n = 8) mCherry+6OHDA: (n = 8)  hM3D+6OHDA: (n = 9) | One-way ANOVA  Treatment:  F (3, 28) = 2.007, p = 0.0061 | Tukey’s multiple comparisons test  mCherry+Sham vs. hM3D+Sham: p = 0.9782  mCherry+6OHDA vs. hM3D+6OHDA: p = 0.0119 | Mean ± s.e.m.  mCherry+Sham:  267.3 ± 15.19  hM3D+Sham: 283.8 ± 12.49  mCherry+6OHDA:  263.5 ± 27.75 hM3D+6OHDA:  393.8 ± 40.52 |
| 6H High speed | One-way ANOVA | Tukey’s multiple | Mean ± s.e.m. |
| movement in OFT |  | comparisons test |  |
|  | Treatment: |  | mCherry+Sham: |
| mCherry+Sham: (n = |  | mCherry+Sham vs. | 9.823 ± 1.179 |
| 7) | F (3, 27) = 4.184, | hM3D+Sham: p = | hM3D+Sham: 9.121 |
| hM3D+Sham: (n = 8) | p = 0.0097 | 0.9929 | ± 1.075 |

| mCherry+6OHDA: (n |  | mCherry+6OHDA | mCherry+6OHDA: |
| --- | --- | --- | --- |
| = 8) |  | vs. hM3D+6OHDA: | 9.309 ± 3.064 |
| hM3D+6OHDA: (n = |  | p = 0.0267 | hM3D+6OHDA: |
| 8) |  |  | 1.743 ± 0.7478 |
| 6I, Middle speed | One-way ANOVA | Tukey’s multiple | Mean ± s.e.m. |
| movement in OFT |  | comparisons test |  |
|  | Treatment: |  | mCherry+Sham: |
| mCherry+Sham: (n = |  | mCherry+Sham vs. | 25.60 ± 1.446 |
| 7) | F (3, 28) = 1.569, | hM3D+Sham: p = | hM3D+Sham: 22.79 |
| hM3D+Sham: (n = 8) | p = 0.0064 | 0.8398 | ± 1.012 |
| mCherry+6OHDA: (n |  | mCherry+6OHDA | mCherry+6OHDA: |
| = 8) |  | vs. hM3D+6OHDA: | 25.82 ± 2.465 |
| hM3D+6OHDA: (n = |  | p = 0.0107 | hM3D+6OHDA: |
| 9) |  |  | 15.05 ± 3.146 |
| 6J Low speed | One-way ANOVA | Tukey’s multiple | Mean ± s.e.m. |
| movement in OFT |  | comparisons test |  |
|  | Treatment: |  | mCherry+Sham: |
| mCherry+Sham: (n = |  | mCherry+Sham vs. | 20.00 ± 0.6693 |
| 7) | F (3, 28) = 3.458, | hM3D+Sham: p = | hM3D+Sham: 20.74 |
| hM3D+Sham: (n = 8) | p = 0.1168 | 0.9906 | ± 0.6988 |
| mCherry+6OHDA: (n |  | mCherry+6OHDA | mCherry+6OHDA: |
| = 8) |  | vs. hM3D+6OHDA: | 20.93 ± 1.251 |
| hM3D+6OHDA: (n = |  | p = 0.1538 | hM3D+6OHDA: |
| 9) |  |  | 15.88 ± 2.642 |
| 6K TST | Unpaired t-test in two-sided manner |  | Mean ± s.e.m. |
| mCherry+6OHDA: (n | t=0.7033, p= 0.4920 |  | mCherry+6OHDA: |
| = 9) |  |  | 108.7 ± 14.96 |
| hM3D+6OHDA: (n = |  |  | hM3D+6OHDA: |
| 9) |  |  | 93.78 ± 14.98 |
| 6L FST | Unpaired t-test in two-sided manner |  | Mean ± s.e.m. |
| mCherry+6OHDA: (n | t=3.449, p=0.0048 |  | mCherry+6OHDA: |
| = 6) |  |  | 130.4 ± 7.711 |
| hM3D+6OHDA: (n = |  |  | hM3D+6OHDA: |
| 7) |  |  | 59.00 ± 21.83 |
| 6M SPT | Unpaired t-test in two-sided manner |  | Mean ± s.e.m. |
| mCherry+6OHDA: (n | t=4.926, p= 0.0005 |  | mCherry+6OHDA: |
| = 7) |  |  | 39.12 ± 6.445 |
| hM3D+6OHDA: (n = |  |  | hM3D+6OHDA: |
| 6) |  |  | 81.04 ± 5.254 |
| 6N Center time in OFT | Mann-Whitney test in two-sided manner |  | Mean ± s.e.m. |

|  | p= 0.6058 |  | mCherry+6OHDA: |
| --- | --- | --- | --- |
| mCherry+6OHDA: (n |  |  | 57.82 ± 9.691 |
| = 9) |  |  | hM3D+6OHDA: |
| hM3D+6OHDA: (n = 8) |  |  | 44.99 ± 16.17 |
| 7C Rotarod test  EGFP+Sham: (n = 10) hM4D+Sham: (n = 9) EGFP+6OHDA: (n = 10)  hM4D+6OHDA: (n = 12) | One-way ANOVA  Treatment:  F (3, 37) = 1.037, p =0.0003 | Tukey’s multiple comparisons test  EGFP+Sham vs.  hM4D+Sham: p = 0.5292  EGFP+6OHDA vs.  hM4D+6OHDA: p = 0.0041 | Mean ± s.e.m.  EGFP+Sham: 99.33± 4.803  hM4D+Sham: 85.93  ± 6.672  EGFP+6OHDA: 55.07 ± 9.028 hM4D+6OHDA:  88.67 ± 5.716 |
| 7D Total distance in OFT  EGFP+Sham: (n = 10) hM4D+Sham: (n = 8) EGFP+6OHDA: (n = 12)  hM4D+6OHDA: (n = 12) | One-way ANOVA  Treatment:  F (3, 38) = 1.608, p <0.0001 | Tukey’s multiple comparisons test  EGFP+Sham vs.  hM4D+Sham: p = 0.8868  EGFP+6OHDA vs.  hM4D+6OHDA: p = 0.0388 | Mean ± s.e.m.  EGFP+Sham: 3028± 222.5  hM4D+Sham: 3298  ± 119.5  EGFP+6OHDA: 1499 ± 275.1 hM4D+6OHDA: 2399 ± 252.2 |
| 7E Velocity in OFT EGFP+Sham: (n = 10) | One-way ANOVA  Treatment: | Tukey’s multiple comparisons test | Mean ± s.e.m.  EGFP+Sham: 10.05± |
| hM4D+Sham: (n = 8) EGFP+6OHDA: (n = 11)  hM4D+6OHDA: (n = | F (3, 37) = 1.675, p <0.0001 | EGFP+Sham vs.  hM4D+Sham: p = 0.7801  EGFP+6OHDA vs. | 0.3977  hM4D+Sham: 10.73 ± 0.3145  EGFP+6OHDA: |
| 12) |  | hM4D+6OHDA: p = 0.0193 | 7.003 ± 0.5351 hM4D+6OHDA:  8.940 ± 0.4969 |
| 7F Immobility in | One-way ANOVA | Tukey’s multiple | Mean ± s.e.m. |
| OFT |  | comparisons test |  |
|  | Treatment: |  | EGFP+Sham: 301.7± |
| EGFP+Sham: (n = 10) |  | EGFP+Sham vs. | 12.66 |
| hM4D+Sham: (n = 9) | F (3, 38) = 1.249, | hM4D+Sham: p = | hM4D+Sham: 315.4 |
| EGFP+6OHDA: (n = | p = 0.0022 | 0.9711 | ± 23.53 |
| 12) |  | EGFP+6OHDA vs. | EGFP+6OHDA: |
| hM4D+6OHDA: (n = |  | hM4D+6OHDA: p = | 414.7 ± 27.87 |

| 12) |  | 0.0495 | hM4D+6OHDA:  338.5 ± 16.25 |
| --- | --- | --- | --- |
| 7G TST  EGFP+Sham: (n = 10) hM4D+Sham: (n = 8) EGFP+6OHDA: (n = 9)  hM4D+6OHDA: (n = 12) | One-way ANOVA  Treatment:  F (3, 35) = 2.249, p = 0.0307 | Tukey’s multiple comparisons test  EGFP+Sham vs.  hM4D+Sham: p = 0.7286  EGFP+6OHDA vs.  hM4D+6OHDA: p = 0.1128 | Mean ± s.e.m.  EGFP+Sham: 114.0± 7.960  hM4D+Sham: 131.1  ± 12.56  EGFP+6OHDA: 121.0 ± 9.354 hM4D+6OHDA:  85.42 ± 12.77 |
| 7H SPT  EGFP+Sham: (n = 8) hM4D+Sham: (n = 9) EGFP+6OHDA: (n = 9)  hM4D+6OHDA: (n = 12) | One-way ANOVA  Treatment:  F (3, 34) = 1.209, p = 0.2254 | Tukey’s multiple comparisons test  EGFP+Sham vs.  hM4D+Sham: p = 0.6649  EGFP+6OHDA vs.  hM4D+6OHDA: p = 0.4752 | Mean ± s.e.m.  EGFP+Sham: 72.89± 4.481  hM4D+Sham: 62.50  ± 4.848  EGFP+6OHDA: 67.70 ± 7.658 hM4D+6OHDA:  55.71 ± 6.043 |
| 7I Center time in OFT  EGFP+Sham: (n = 10) hM4D+Sham: (n = 9) EGFP+6OHDA: (n = 11)  hM4D+6OHDA: (n = 12) | One-way ANOVA  Treatment:  F (3, 38) = 1.889, p = 0.1237 | Tukey’s multiple comparisons test  EGFP+Sham vs.  hM4D+Sham: p = 0.2465  EGFP+6OHDA vs.  hM4D+6OHDA: p = 0.3951 | Mean ± s.e.m.  EGFP+Sham: 64.14  ± 9.403  hM4D+Sham: 32.86  ± 7.593  EGFP+6OHDA: 62.62 ± 17.07 hM4D+6OHDA:  38.77 ± 6.024 |
| S 4A Total distance in OFT  Pre ChR2-10Hz: (n = 6)  Light ChR2-10Hz: (n = 6)  Post ChR2-10Hz: (n = 4)  Pre ChR2-20Hz: (n = 5) | Two-way ANOVA  Interaction:  F (4, 36) = 0.8777 P=0.4869  Row Factor:  F (2, 36) = 3.864 P=0.0302  Column Factor: F (2, 36) = 2.309 P=0.1139 | Bonferroni’s multiple comparisons test  ChR2-10Hz  Pre vs. Light:  p >0.9999  Light vs. Post: p=0.4685  ChR2-20Hz Pre vs. Light: p >0.9999 | Mean ± s.e.m.  Pre ChR2-10Hz: 410.8 ± 87.88  Light ChR2-10Hz: 501.9 ± 38.74  Post ChR2-10Hz:  336.2 ± 70.35  Pre ChR2-20Hz: 512.2 ± 115.6  Light ChR2-20Hz: |

| Light ChR2-20Hz: (n = 5)  Post ChR2-20Hz: (n = 5)  Pre ChR2-30Hz: (n = 5)  Light ChR2-30Hz: (n = 5)  Post ChR2-30Hz: (n = 4) |  | Light vs. Post: p>0.9999  ChR2-30Hz  Pre vs. Light: p =0.6138  Light vs. Post: P=0.1778 | 622.1 ± 104.3  Post ChR2-20Hz:  649.3 ± 35  Pre ChR2-30Hz: 474.6 ± 93.34  Light ChR2-30Hz: 619.4 ± 44.36  Post ChR2-30Hz:  387.8 ± 77.15 |
| --- | --- | --- | --- |
| S 4B Velocity in OFT | Two-way ANOVA | Bonferroni’s multiple | Mean ± s.e.m. |
| Pre ChR2-10Hz: (n = | Interaction: | comparisons test | Pre ChR2-10Hz: |
| 5) | F (4, 35) = 0.9101 | ChR2-10Hz | 4.22 ± 0.5791 |
| Light ChR2-10Hz: (n | P=0.4688 | Pre vs. Light: | Light ChR2-10Hz: |
| = 6) | Row Factor: | p= 0.7964 | 5.359 ± 0.3949 |
| Post ChR2-10Hz: (n = | F (2, 35) = 2.337 | Light vs. Post: | Post ChR2-10Hz: |
| 4) | P=0.1115 | p >0.9999 | 4.416 ± 0.8667 |
|  | Column Factor: |  |  |
| Pre ChR2-20Hz: (n = | F (2, 35) = 2.383 | ChR2-20Hz | Pre ChR2-20Hz: |
| 5) | P=0.1070 | Pre vs. Light: | 4.925 ± 1.03 |
| Light ChR2-20Hz: (n |  | p = 0.8153 | Light ChR2-20Hz: |
| = 4) |  | Light vs. Post: | 6.17 ± 0.9141 |
| Post ChR2-20Hz: (n = |  | p>0.9999 | Post ChR2-20Hz: |
| 5) |  |  | 6.399 ± 0.6167 |
|  |  | ChR2-30Hz |  |
| Pre ChR2-30Hz: (n = |  | Pre vs. Light: | Pre ChR2-30Hz: |
| 5) |  | p = 0.5590 | 4.489 ± 0.7705 |
| Light ChR2-30Hz: (n |  | Light vs. Post: | Light ChR2-30Hz: |
| = 5) |  | p= 0.1009 | 5.906 ± 0.3794 |
| Post ChR2-30Hz: (n = |  |  | Post ChR2-30Hz: |
| 5) |  |  | 3.582 ± 1.063 |
| S 5A Cylinder test | Two-way ANOVA | Bonferroni’s multiple | Mean ± s.e.m. |
| Pre mCherry: (n = 7) | Interaction: | comparisons test | Pre mCherry: 48.62± |
| Pre ChR2: (n = 7) | F (2, 32) = 0.06588 |  | 3.07 |
| Light mCherry: (n = 8) | P=0.9364 | mCherry - ChR2: | Pre ChR2: 57.35 ± |
| Light ChR2: (n = 7) | Row Factor: | Pre p > 0.9999 | 10.12 |

| Post mCherry: (n = 5)  Post ChR2: (n = 4) | F (1, 32) = 0.5289 P=0.4724  Column Factor: F (2, 32) = 2.373 P=0.1094 | Light p > 0.9999 Post p > 0.9999 | Light mCherry: 43.65 ± 6.441  Light ChR2: 50.34 ± 12.99  Post mCherry: 30.67 ± 6.983  Post ChR2: 32.21 ± 13.82 |
| --- | --- | --- | --- |
| S 5B Cylinder test  Pre mCherry: (n = 7) Pre ChR2: (n = 6)  Light mCherry: (n = 7) Light ChR2: (n = 6)  Post mCherry: (n = 7) Post ChR2: (n = 6) | Two-way ANOVA  Interaction:  F (2, 33) = 0.6951 P=0.5062  Row Factor:  F (1, 33) = 0.9776 P=0.3300  Column Factor:  F (2, 33) = 0.1454 P=0.8652 | Bonferroni’s multiple  comparisons test  mCherry - ChR2: Pre p > 0.9999 Light p = 0.5085 Post p > 0.9999 | Mean ± s.e.m.  Pre mCherry: 0 ±  2.488  Pre ChR2: 0.8333 ± 2.136  Light mCherry: 2.286 ± 2.244  Light ChR2: -2.167 ± 2.713  Post mCherry: 2.143 ± 1.405  Post ChR2: 0.3333 ± 2.305 |
| S 5C OFT  Pre mCherry: (n = 6) Pre ChR2: (n = 6)  Light mCherry: (n = 6) Light ChR2: (n = 6)  Post mCherry: (n = 6) Post ChR2: (n = 6) | Two-way ANOVA  Interaction:  F (2, 30) = 0.1852 P=0.8318  Row Factor:  F (1, 30) = 9.229 P=0.0049  Column Factor:  F (2, 30) = 0.07939 P=0.9239 | Bonferroni’s multiple  comparisons test  mCherry - ChR2: Pre p = 0.2521  Light p = 0.6025 Post p = 0.1150 | Mean ± s.e.m.  Pre mCherry: 4.609± 0.2512  Pre ChR2: 3.601 ± 0.257  Light mCherry: 4.59 ± 0.4173  Light ChR2: 3.852 ± 0.5068  Post mCherry: 4.868 ± 0.3159  Post ChR2: 3.646 ± 0.5426 |
| S 5D OFT | Two-way ANOVA | Bonferroni’s multiple | Mean ± s.e.m. |
| Pre mCherry: (n = 6) | Interaction: | comparisons test | Pre mCherry: 63.78± |
| Pre ChR2: (n = 6) | F (2, 30) = 0.1269 |  | 14.49 |
| Light mCherry: (n = 6) | P=0.8813 | mCherry - ChR2: | Pre ChR2: 74.64 ± |
| Light ChR2: (n = 6) | Row Factor: | Pre p > 0.9999 | 11.42 |
| Post mCherry: (n = 6) | F (1, 30) = 1.667 | Light p >0.9999 | Light mCherry: 51.52 |
| Post ChR2: (n = 6) | P=0.2065 | Post p = 0.7960 | ± 11.23 |

|  | Column Factor:  F (2, 30) = 0.8366 P=0.4430 |  | Light ChR2: 58.65 ± 6.929  Post mCherry: 57.07 ± 10.96  Post ChR2: 75.6 ± 12.84 |
| --- | --- | --- | --- |
| S 5E OFT  Pre mCherry: (n = 7) Pre ChR2: (n = 7)  Light mCherry: (n = 7) Light ChR2: (n = 6)  Post mCherry: (n = 7) Post ChR2: (n = 6) | Two-way ANOVA  Interaction:  F (2, 33) = 0.01826 P=0.9819  Row Factor:  F (1, 33) = 3.196 P=0.0830  Column Factor:  F (2, 33) = 0.3835 P=0.6845 | Bonferroni’s multiple  comparisons test  mCherry - ChR2: Pre p > 0.9999 Light p = 0.8883 Post p = 0.7751 | Mean ± s.e.m.  Pre mCherry: -  0.8333 ± 0.654  Pre ChR2: 0 ±  0.4472  Light mCherry: - 0.8571 ± 0.4592  Light ChR2: 0 ± 0.3651  Post mCherry: -  0.4286 ± 0.5281 Post ChR2: 0.5 ± 0.922 |
| S 5F Cylinder test  Pre mCherry: (n = 9) Pre eNpHR: (n = 12) Light mCherry: (n = 10)  Light eNpHR: (n = 13) Post mCherry: (n = 10)  Post eNpHR: (n = 14) | Two-way ANOVA  Interaction:  F (2, 62) = 1.037 P=0.3605  Row Factor:  F (1, 62) = 0.5902 P=0.4453  Column Factor:  F (2, 62) = 0.05104 P=0.9503 | Bonferroni’s multiple  comparisons test  mCherry - eNpHR: Pre p > 0.9999  Light p = 0.4141 Post p >0.9999 | Mean ± s.e.m.  Pre mCherry: 42.69± 3.598  Pre eNpHR: 39.47 ± 3.154  Light mCherry: 37.49 ± 3.481  Light eNpHR: 45.79 ± 2.949  Post mCherry: 41.17 ± 5.848  Post eNpHR: 43.52± 4.017 |
| S 5G Cylinder test | Two-way ANOVA | Bonferroni’s multiple | Mean ± s.e.m. |
| Pre mCherry: (n = 10) | Interaction: | comparisons test | Pre mCherry: 0 ± |
| Pre eNpHR: (n = 15) | F (2, 67) = 1.212 |  | 0.4714 |
| Light mCherry: (n = | P=0.3040 | mCherry - eNpHR: | Pre eNpHR: 0 ± |
| 10) | Row Factor: | Pre p > 0.9999 | 0.7622 |
| Light eNpHR: (n = 14) | F (1, 67) = 0.1261 | Light p = 0.5051 | Light mCherry: -0.3 |
| Post mCherry: (n = | P=0.7237 | Post p >0.9999 | ± 0.857 |
| 10) | Column Factor: |  | Light eNpHR: 1 ± |
| Post eNpHR: (n = 14) | F (2, 67) = 0.2490 |  | 0.4917 |

|  | P=0.7803 |  | Post mCherry: 0.8 ± 0.6464  Post eNpHR: 0.07143 ± 0.529 |
| --- | --- | --- | --- |
| S 5H OFT  Pre mCherry: (n = 10) Pre eNpHR: (n = 15) Light mCherry: (n = 9) Light eNpHR: (n = 15) Post mCherry: (n = 10)  Post eNpHR: (n = 15) | Two-way ANOVA  Interaction:  F (2, 68) = 0.2306 P=0.7947  Row Factor:  F (1, 68) = 10.16 P=0.0022  Column Factor: F (2, 68) = 11.21 P<0.0001 | Bonferroni’s multiple  comparisons test  mCherry - eNpHR: Pre p = 0.5836  Light p = 0.1052 Post p = 0.1321 | Mean ± s.e.m.  Pre mCherry: 8.481±  0.726  Pre eNpHR: 9.485 ± 0.4671  Light mCherry: 6.265 ± 0.3436  Light eNpHR: 7.966 ± 0.4463  Post mCherry: 5.737 ± 0.4231  Post eNpHR: 7.308± 0.6155 |
| S 5I OFT  Pre mCherry: (n = 8) Pre eNpHR: (n = 15) Light mCherry: (n = 7) Light eNpHR: (n = 13) Post mCherry: (n = 7) Post eNpHR: (n = 15) | Two-way ANOVA  Interaction:  F (2, 58) = 0.1173 P=0.8895  Row Factor:  F (1, 58) = 1.656 P=0.2033  Column Factor: F (2, 58) = 1.064 P=0.3518 | Bonferroni’s multiple  comparisons test  mCherry - eNpHR: Pre p > 0.9999  Light p > 0.9999 Post p = 0.7697 | Mean ± s.e.m.  Pre mCherry: 8.957±  2.255  Pre eNpHR: 7.589 ± 1.572  Light mCherry: 6.474 ± 1.827  Light eNpHR: 5.187 ± 1.172  Post mCherry: 7.941 ± 2.145  Post eNpHR: 5.178± 1.253 |
| S 5J OFT | Two-way ANOVA | Bonferroni’s multiple | Mean ± s.e.m. |
| Pre mCherry: (n = 9) | Interaction: | comparisons test | Pre mCherry: 4.67 ± |
| Pre eNpHR: (n = 13) | F (2, 64) = 0.7391 |  | 0.9492 |
| Light mCherry: (n = | P=0.4816 | mCherry - eNpHR: | Pre eNpHR: 6.499 ± |
| 10) | Row Factor: | Pre p > 0.9999 | 0.6925 |
| Light eNpHR: (n = 14) | F (1, 64) = 0.2215 | Light p > 0.9999 | Light mCherry: 8.385 |
| Post mCherry: (n = | P=0.6395 | Post p > 0.9999 | ± 1.603 |
| 10) | Column Factor: |  | Light eNpHR: 7.147 |
| Post eNpHR: (n = 14) | F (2, 64) = 2.453 |  | ± 0.957 |
|  | P=0.0941 |  | Post mCherry: 7.885 ± 1.504 |

|  |  |  | Post eNpHR: 8.783± 1.602 |
| --- | --- | --- | --- |
| S 5K OFT  Pre mCherry: (n = 10) Pre eNpHR: (n = 15) Light mCherry: (n = 10)  Light eNpHR: (n = 15) Post mCherry: (n = 10)  Post eNpHR: (n = 15) | Two-way ANOVA  Interaction:  F (2, 69) = 0.2546 P=0.7760  Row Factor:  F (1, 69) = 2.079 P=0.1539  Column Factor:  F (2, 69) = 0.5957 P=0.5540 | Bonferroni’s multiple  comparisons test  mCherry - eNpHR: Pre p > 0.9999  Light p = 0.9151 Post p = 0.6963 | Mean ± s.e.m.  Pre mCherry: 0 ±  0.4472  Pre eNpHR: 0.2 ±  0.5182  Light mCherry: 0.2 ± 0.4667  Light eNpHR: 1 ±  0.5255  Post mCherry: -0.4± 0.8459  Post eNpHR: 0.5333 ± 0.3887 |
| S 5L Cylinder test  Pre mCherry: (n = 6) Pre ChR2: (n = 7)  Light mCherry: (n = 6) Light ChR2: (n = 7)  Post mCherry: (n = 6) Post ChR2: (n = 7) | Two-way ANOVA  Interaction:  F (2, 33) = 0.2557 P=0.7759  Row Factor:  F (1, 33) = 0.1088 P=0.7436  Column Factor:  F (2, 33) = 0.1298 P=0.8787 | Bonferroni’s multiple  comparisons test  mCherry - ChR2: Pre p > 0.9999 Light p > 0.9999 Post p > 0.9999 | Mean ± s.e.m.  Pre mCherry: 3.222± 0.3817  Pre ChR2: 3.524 ± 0.3159  Light mCherry: 3.444 ± 0.2049  Light ChR2: 3.286 ± 0.3946  Post mCherry: 3.167 ± 0.2822  Post ChR2: 3.286 ± 0.2948 |
| S 5M Cylinder test  Pre mCherry: (n = 6) Pre ChR2: (n = 7)  Light mCherry: (n = 6) Light ChR2: (n = 7)  Post mCherry: (n = 6) Post ChR2: (n = 7) | Two-way ANOVA  Interaction:  F (2, 33) = 2.408 P=0.1056  Row Factor:  F (1, 33) = 0.7385 P=0.3964  Column Factor: F (2, 33) = 1.682 P=0.2016 | Bonferroni’s multiple  comparisons test  mCherry - ChR2: Pre p = 0.7609  Light p > 0.9999 Post p = 0.1931 | Mean ± s.e.m.  Pre mCherry: - 0.8333 ± 0.7136  Pre ChR2: 0.381 ± 1.092  Light mCherry: - 0.2778 ± 0.629  Light ChR2: -1.048±  0.8275  Post mCherry: 1.667 ± 0.3752  Post ChR2: -0.3333± 0.3849 |
| S 5N Open field test  Pre mCherry: (n = 6) Pre ChR2: (n = 7)  Light mCherry: (n = 6) Light ChR2: (n = 7)  Post mCherry: (n = 6) Post ChR2: (n = 7) | Two-way ANOVA  Interaction:  F (2, 33) = 0.3358 P=0.7171  Row Factor:  F (1, 33) = 0.2202  P=0.6420  Column Factor: F (2, 33) = 4.191  P=0.0239 | Bonferroni’s multiple  comparisons test  mCherry - ChR2: Pre p > 0.9999 Light p > 0.9999 Post p > 0.9999 | Mean ± s.e.m.  Pre mCherry: 2.452± 0.3319  Pre ChR2: 2.9 ±  0.5242  Light mCherry: 1.794 ± 0.3605  Light ChR2: 1.735 ± 0.2034  Post mCherry: 1.911 ± 0.3241  Post ChR2: 1.911 ± 0.132 |
| S 6A  TST-6OHDA 3w Sham: (n = 6)  6OHDA: (n = 8)  TST-6OHDA 5w Sham: (n = 6)  6OHDA: (n = 9)  TST-6OHDA 7w Sham: (n = 6)  6OHDA: (n = 8) | TST-6OHDA 3w  Unpaired t-test in two-sided manner  t=4.361, P= 0.0009  TST-6OHDA 5w  Unpaired t-test in two-sided manner  t=2.022, P=0.0642  TST-6OHDA 7w  Unpaired t-test in two-sided manner  t=0.6773, P=0.5111 |  | Mean ± s.e.m.  TST-6OHDA 3w  Sham: 76.67 ±  20.66  6OHDA: 172.3 ±  11.14  TST-6OHDA 5w  Sham: 88.67 ±  28.69  6OHDA: 147.8 ±  14.58  TST-6OHDA 7w  Sham: 153.5 ±  18.59  6OHDA: 167.1 ±  10.59 |
| S 6B |  |  | Mean ± s.e.m. |
|  | FST-6OHDA 3w |  |  |
| FST-6OHDA 3w | Unpaired t-test in two-sided manner |  | FST-6OHDA 3w |
| Sham: (n = 6) | t=0.2947, P=0.7728 |  | Sham: 79.17 ± |
| 6OHDA: (n = 9) |  |  | 22.40 |
|  | FST-6OHDA 5w |  | 6OHDA: 70.78 ± |
| FST-6OHDA 5w | Unpaired t-test in two-sided manner |  | 17.82 |
| Sham: (n = 6) | t=0.5098, P=0.6188 |  |  |

| 6OHDA: (n = 9) FST-6OHDA 7w  Sham: (n = 6)  6OHDA: (n = 9) | FST-6OHDA 7w  Mann-Whitney test in two-sided manner  P= 0.7143 |  | FST-6OHDA 5w  Sham: 124.5 ±  21.54  6OHDA: 138.6 ±  17.34  FST-6OHDA 7w  Sham: 163.5 ±  21.26  6OHDA: 175.7 ±  19.99 |
| --- | --- | --- | --- |
| S 6C  NSF-6OHDA 3 5w Sham: (n = 6)  6OHDA: (n = 9)  NSF-6OHDA 5 7w Sham: (n = 6)  6OHDA: (n = 9) | NSF-6OHDA 3 5w  Mann-Whitney test in two-sided manner  P= 0.2260  NSF-6OHDA 5 7w Unpaired t-test in two-sided manner  t=0.7844, P=0.4468 |  | Mean ± s.e.m.  NSF-6OHDA 3 5w  Sham: 204.2 ± 26.25  6OHDA: 244.3 ±  20.36  NSF-6OHDA 5 7w  Sham: 205.0 ± 60.85  6OHDA: 283.9 ±  70.93 |
| S 6D  SPT-6OHDA 3w-2hr Sham: (n = 6)  6OHDA: (n = 9)  SPT-6OHDA 5w –  2hr  Sham: (n = 6) 6OHDA: (n = 9)  SPT-6OHDA 7w –  2hr  Sham: (n = 6) 6OHDA: (n = 9) | SPT-6OHDA 3w-  2hr  Unpaired t-test in two-sided manner    t=1.988, p=0.0701  SPT-6OHDA 5w –  2hr  Unpaired t-test in two-sided manner  t=0.8257, p=0.4239  SPT-6OHDA 7w –  2hr  Unpaired t-test in two-sided manner  t=0.4627, p=0.6512 |  | Mean ± s.e.m.  SPT-6OHDA 3w-2hr Sham: 79.62 ± 5.043  6OHDA: 89.27 ±  1.920  SPT-6OHDA 5w –  2hr  Sham: 83.01 ±  3.147  6OHDA: 79.23 ±  3.071  SPT-6OHDA 7w –  2hr  Sham: 82.95 ±  2.832  6OHDA: 84.56 ± |

|  |  |  | 2.127 |
| --- | --- | --- | --- |
| S 6E | SPT-6OHDA 5w- |  | Mean ± s.e.m. |
| SPT-6OHDA 5w-  24hr  Sham: (n = 6) 6OHDA: (n = 9) | 24hr  Mann-Whitney test in two-sided manner  P= 0.5287  SPT-6OHDA 7w – |  | SPT-6OHDA 5w-  24hr  Sham: 89.16 ±  2.215  6OHDA: 84.60 ± |
| SPT-6OHDA 7w –  24hr  Sham: (n = 6) 6OHDA: (n = 9) | 24hr  Unpaired t-test in two-sided manner  t=0.7804, p=0.4491 |  | 3.576  SPT-6OHDA 7w –  24hr  Sham: 92.09 ±  0.9259  6OHDA: 90.91 ±  1.064 |
| S 7A Open field test | Unpaired t-test in two-sided manner |  | Mean ± s.e.m. |
| EGFP: (n = 8)  taCasp3: (n = 12) | t=0.4395, p= 0.6655 |  | EGFP: 173.2 ±  15.23  taCasp3: 166.0 ±  8.712 |
| S 7B Open field test | Unpaired t-test in two-sided manner |  | Mean ± s.e.m. |
| EGFP: (n = 8)  taCasp3: (n = 12) | t=0.3781, p= 0.7098 |  | EGFP: 520.6 ±  12.29  taCasp3: 513.9 ±  11.93 |
| S 7C Open field test  EGFP+6OHDA: (n =  8)  taCasp3+6OHDA: (n  = 12) | Unpaired t-test in two-sided manner  t=1.030, p= 0.3164 |  | Mean ± s.e.m.  EGFP+6OHDA:  368.3 ± 14.91  taCasp3+6OHDA:  391.2 ± 15.20 |
| S 7D Open field test | Unpaired t-test in  two-sided manner  t=0.1549, p= 0.8786 |  | Mean ± s.e.m. |
| EGFP+6OHDA: (n =  8)  taCasp3+6OHDA: (n  = 12) |  |  | EGFP+6OHDA:  36.52 ± 8.346  taCasp3+6OHDA:  38.31 ± 7.605 |
|  |  |
|  |  |
|  |  |
